# Supplementary material for: Down/up conversion luminescence of erbium-ytterbium co-deposited nanoparticles on carbon nanotubes via a microwave-assisted method
Source: PeerJ journal article supplement (doi:10.7717/peerj-matsci.33), 2025-03-07
Supplement: Figure5.zip [file Figure5.zip]

## Sheet: Hoja1
131.932	70
133.183	69.9619
134.432	69.8899
135.681	70.0174
136.929	69.9676
138.178	70.0461
139.426	69.9711
140.674	69.9117
141.923	70.0036
143.171	70.0316
144.418	70.044
145.665	70.012
146.912	69.8666
148.159	70.0042
149.405	70.0061
150.652	69.9702
151.898	70.0974
153.144	70.0028
154.39	69.8951
155.635	69.9988
156.881	70.0959
158.126	69.8748
159.371	69.8611
160.615	70.0508
161.86	70.0815
163.104	69.8851
164.349	69.9992
165.592	70.069
166.836	70.0657
168.08	70.1028
169.323	69.9835
170.566	70.0336
171.809	69.8699
173.052	70.0518
174.295	70.0068
175.537	70.0583
176.779	70.0863
178.02	69.9343
179.261	69.9845
180.503	69.9812
181.744	70.1957
182.986	70.0424
184.227	69.9752
185.467	70.058
186.708	70.0782
187.947	69.9574
189.187	70.2438
190.427	70.05
191.667	69.8941
192.906	70.0238
194.144	69.9214
195.383	69.9781
196.622	69.9252
197.861	69.9715
199.1	70.0386
200.337	69.9727
201.575	70.0111
202.813	70.0195
204.051	70.0358
205.287	69.9594
206.524	70.1544
207.761	70.1328
208.997	69.9795
210.234	70.2384
211.47	69.9494
212.707	69.9877
213.941	70.1385
215.177	70.1562
216.413	69.9717
217.647	69.808
218.883	69.7553
220.118	69.9426
221.351	69.8598
222.586	69.944
223.819	69.886
225.054	69.8515
226.288	69.8749
227.521	69.7942
228.754	69.8049
229.987	69.8224
231.22	69.9626
232.453	69.821
233.685	70.1346
234.918	69.7895
236.149	69.8397
237.381	69.9577
238.612	70.073
239.844	69.9327
241.075	69.9815
242.306	69.9769
243.536	70.1314
244.767	70.2559
245.997	70.0464
247.228	70.0496
248.457	70.0188
249.688	70.0911
250.916	69.9873
252.147	70.0048
253.375	70.064
254.605	70.1011
255.833	70.1277
257.061	69.9991
258.29	70.0309
259.517	70.1671
260.746	70.1116
261.973	69.9829
263.2	70.0369
264.428	70.0987
265.654	70.034
266.882	69.9484
268.108	69.9711
269.334	69.9429
270.561	69.8208
271.787	69.9126
273.012	69.9379
274.239	69.8719
275.463	69.9115
276.688	69.7868
277.913	70.0077
279.138	69.973
280.363	70.0217
281.586	69.8043
282.812	69.7905
284.035	69.8718
285.259	69.7484
286.482	69.8767
287.706	69.7754
288.929	69.6871
290.151	69.7972
291.374	69.8759
292.596	69.8033
293.819	69.7555
295.041	69.9516
296.263	69.8594
297.484	69.8142
298.705	69.9294
299.926	69.9429
301.149	69.7738
302.369	69.8655
303.59	69.8072
304.81	69.8246
306.03	69.8263
307.25	69.7928
308.469	69.8063
309.689	69.855
310.908	69.9571
312.129	69.8114
313.348	70.0075
314.566	69.944
315.785	69.8505
317.003	69.9852
318.221	69.8956
319.439	69.8856
320.657	69.9212
321.874	70.1107
323.092	69.8998
324.309	70.0463
325.526	70.0819
326.742	70.0966
327.959	70.1635
329.175	70.1378
330.391	70.0403
331.607	70.2699
332.823	69.944
334.039	69.886
335.254	69.8515
336.469	69.8749
337.683	69.7942
338.898	69.8049
340.112	69.8224
341.327	69.9626
342.541	69.821
343.755	70.1346
344.969	69.7895
346.183	69.8397
347.396	69.9577
348.608	70.073
349.821	69.9327
351.034	69.9815
352.247	69.9769
353.459	70.1314
354.671	70.2559
355.882	70.0464
357.094	70.0496
358.306	70.0188
359.517	70.0911
360.727	69.9873
361.938	70.0048
363.149	70.064
364.36	70.1011
365.569	70.1277
366.78	69.9991
367.99	70.0309
369.2	70.1671
370.408	70.1116
371.618	69.9829
372.827	70.0369
374.035	70.0987
375.244	70.034
376.453	69.9484
377.66	69.9711
378.869	69.9429
380.077	69.8208
381.284	69.9126
382.491	69.9379
383.699	69.8719
384.905	69.9115
386.113	69.7868
387.32	70.0077
388.525	69.973
389.732	70.0217
390.937	69.8043
392.143	69.7905
393.348	69.8718
394.554	69.7484
395.759	69.8767
396.964	69.7754
398.17	69.6871
399.373	69.7972
400.578	69.8759
401.782	69.8033
402.987	69.7555
404.19	69.9516
405.394	69.8594
406.596	69.8142
407.8	69.9294
409.003	69.9429
410.205	69.7738
411.408	69.8655
412.61	69.8072
413.813	69.8246
415.014	69.8263
416.217	69.7928
417.418	69.8063
418.618	69.855
419.82	69.9571
421.021	69.8114
422.222	70.0075
423.422	69.944
424.622	69.8505
425.823	69.9852
427.023	69.8956
428.222	69.8856
429.422	69.9212
430.621	70.1107
431.82	69.8998
433.02	70.0463
434.218	70.0819
435.416	70.0966
436.614	70.1635
437.813	70.1378
439.011	70.0403
440.208	70.2699
441.405	70.1942
442.604	70.2867
443.801	70.3728
444.997	70.1249
446.194	70.164
447.391	70.2436
448.587	69.9605
449.783	70.0348
450.979	70.1052
452.174	70.1143
453.37	70.1104
454.566	69.9316
455.761	70.0085
456.956	70.0568
458.15	70.0033
459.345	70.0045
460.539	69.9249
461.733	69.9157
462.928	70.0083
464.121	70.1244
465.315	69.9169
466.508	70.0382
467.701	69.8907
468.894	70.2534
470.087	70.1216
471.279	69.948
472.471	70.0941
473.663	69.9871
474.855	70.0444
476.047	69.7887
477.239	69.8721
478.43	69.9934
479.621	69.9725
480.812	69.9268
482.003	69.885
483.193	70.1341
484.384	69.9762
485.574	70.104
486.764	69.9617
487.954	70.0752
489.144	69.9825
490.333	69.9303
491.522	69.9889
492.711	69.9119
493.899	70.0762
495.088	70.0174
496.276	70.0396
497.465	69.926
498.653	69.9899
499.841	69.9611
501.028	69.9806
502.215	69.9662
503.402	70.0457
504.589	70.0861
505.776	69.8682
506.963	69.9777
508.15	69.8459
509.335	70.0702
510.521	70.1849
511.707	69.8705
512.893	69.9669
514.078	69.8743
515.263	69.8794
516.449	69.7606
517.634	69.8819
518.817	69.7096
520.002	69.8413
521.187	69.8686
522.371	69.9351
523.554	69.845
524.738	69.6975
525.922	69.8866
527.104	69.8604
528.288	69.9
529.471	70.3403
530.653	69.7037
531.836	69.6123
533.017	69.6109
534.2	69.6069
535.382	69.6329
536.563	69.7346
537.745	69.681
538.926	69.7931
540.107	69.853
541.289	69.6534
542.469	69.712
543.65	69.7341
544.829	69.674
546.01	69.7248
547.189	69.6621
548.37	69.722
549.548	69.7284
550.728	69.7466
551.907	69.7981
553.086	69.9507
554.265	69.8311
555.444	69.8506
556.621	69.8349
557.8	69.7174
558.978	69.9143
560.156	69.9116
561.333	69.931
562.511	69.8774
563.688	69.9491
564.864	69.9725
566.042	69.8746
567.218	70.0284
568.395	70.057
569.571	69.9408
570.746	70.0216
571.923	69.891
573.098	69.9561
574.273	69.9313
575.449	69.9442
576.624	70.1567
577.798	69.9831
578.974	70
580.148	70.045
581.322	69.9804
582.497	69.981
583.67	69.9504
584.843	70.0215
586.016	70.0612
587.191	70.088
588.364	70.0403
589.536	70.0749
590.708	69.9307
591.881	69.9535
593.054	70.1094
594.226	69.9326
595.397	69.9567
596.569	70.0461
597.74	69.9711
598.913	69.9117
600.084	70.0036
601.254	70.0316
602.425	70.044
603.595	70.012
604.765	69.8666
605.935	70.0042
607.107	70.0061
608.276	69.9702
609.446	70.0974
610.615	70.0028
611.784	69.8951
612.953	69.9988
614.122	70.0959
615.29	69.8748
616.459	69.8611
617.627	70.0508
618.795	70.0815
619.963	70.2653
621.13	70.3224
622.298	70.4342
623.465	70.7742
624.632	70.6473
625.799	70.6926
626.966	70.7586
628.132	70.7895
629.299	70.8817
630.465	70.9166
631.631	70.5886
632.797	70.5243
633.962	70.4142
635.128	70.4972
636.293	70.6245
637.458	70.4284
638.622	70.3431
639.786	70.2578
640.951	70.4372
642.115	70.2567
643.279	70.2287
644.443	70.2652
645.607	70.3762
646.769	70.3162
647.933	70.3241
649.096	70.5851
650.259	70.773
651.422	70.563
652.584	70.7965
653.746	70.5891
654.909	70.6492
656.071	70.5422
657.231	70.6114
658.393	70.8866
659.555	70.8762
660.716	71.1384
661.876	71.278
663.037	71.4214
664.198	71.5088
665.358	71.8076
666.518	71.8271
667.679	71.5649
668.839	71.7892
669.998	71.9705
671.158	71.7774
672.316	72.0669
673.475	72.329
674.635	72.4594
675.792	72.5311
676.951	72.6628
678.11	72.7867
679.267	72.8257
680.426	72.9535
681.583	73.3108
682.741	73.6029
683.897	73.9511
685.055	73.9367
686.213	74.4388
687.369	74.7309
688.526	75.096
689.681	75.6607
690.838	76.0128
691.993	76.5449
693.15	77.18
694.305	77.57
695.461	77.9299
696.615	78.1436
697.77	78.2687
698.925	78.232
700.079	78.2384
701.235	78.233
702.388	78.0867
703.543	78.1335
704.696	77.712
705.85	77.4835
707.004	76.6432
708.157	75.906
709.311	75.1361
710.463	74.7145
711.615	74.5069
712.769	73.9562
713.921	73.879
715.072	73.7183
716.225	73.5681
717.377	73.3461
718.528	73.3654
719.679	73.2347
720.831	73.2175
721.982	72.9237
723.132	72.9704
724.284	72.8906
725.434	72.7377
726.584	72.6983
727.733	72.8793
728.883	72.8895
730.034	73.1618
731.183	73.2398
732.332	73.4169
733.481	73.6214
734.63	73.7515
735.779	74.3043
736.928	74.9393
738.076	75.5507
739.224	76.3853
740.372	77.4246
741.519	78.7366
742.668	79.8124
743.815	80.5869
744.962	81.1188
746.109	81.0584
747.256	81.1142
748.403	80.395
749.549	79.6328
750.695	78.8472
751.841	78.398
752.987	77.8211
754.133	77.5898
755.278	77.2502
756.424	77.4337
757.569	77.1933
758.714	76.9894
759.859	76.732
761.003	75.9776
762.148	75.3536
763.292	74.4596
764.436	73.9661
765.58	73.3342
766.724	72.9633
767.867	72.6172
769.011	72.2463
770.154	72.2758
771.297	72.2962
772.44	72.0753
773.581	72.2613
774.724	72.3339
775.866	72.5734
777.008	72.6604
778.15	72.7577
779.292	73.1381
780.434	72.9576
781.574	72.8475
782.715	72.1726
783.856	71.7311
784.997	71.2871
786.138	70.8352
787.277	70.5803
788.417	70.3501
789.558	70.2179
790.698	69.9877
791.838	70.1385
792.976	70.1562
794.115	69.9717
795.255	69.808
796.393	69.7553
797.532	69.9426
798.67	69.8598
799.808	69.944
800.946	69.886
802.085	69.8515
803.221	69.8749
804.359	69.7942
805.497	69.8049
806.633	69.8224
807.771	69.9626
808.908	69.821
810.044	70.1346
811.181	69.7895
812.316	69.8397
813.453	69.9577
814.589	70.073
815.724	69.9327
816.86	69.9815
817.994	69.9769
819.13	70.1314
820.264	70.2559
821.4	70.0464
822.534	70.0496
823.669	70.0188
824.802	70.0911
825.937	69.9873
827.07	70.0048
828.204	70.064
829.337	70.1011
830.47	70.1277
831.6	69.9991
832.74	70.0309
833.87	70.1671
835	70.1116
836.13	69.9829
837.27	70.0369
838.4	70.0987
839.53	70.034
840.66	69.9484
841.79	69.9711
842.92	69.9429
844.05	69.8208
845.19	69.9126
846.32	69.9379
847.45	69.8719
848.58	69.9115
849.71	69.7868
850.84	70.0077
851.97	69.973
853.1	70.0217
854.23	69.8043
855.35	69.7905
856.48	69.8718
857.61	69.7484
858.74	69.8767
859.87	69.7754
861	69.6871
862.13	69.7972
863.25	69.8759
864.38	69.8033
865.51	69.7555
866.64	69.9516
867.76	69.8594
868.89	69.8142
870.02	69.9294
871.14	69.9429
872.27	69.7738
873.4	69.8655
874.52	69.8072
875.65	69.8246
876.77	69.8263
877.9	69.7928
879.02	69.8063
880.15	69.855
881.27	69.9571
882.4	69.8114
883.52	70.0075
884.65	69.944
885.77	69.8505
886.9	69.9852
888.02	69.8956
889.14	69.8856
890.27	69.9212
891.39	70.1107
892.51	69.8851
893.64	69.9992
894.76	70.069
895.88	70.0657
897	70.1028
898.13	69.9835
899.25	70.0336
900.37	69.8699
901.49	70.0518
902.61	70.0068
903.73	70.0583
904.86	70.0863
905.98	69.9343
907.1	69.9845
908.22	69.9812
909.34	70.1957
910.46	70.0424
911.58	69.9752
912.7	70.058
913.82	70.0782
914.94	69.9574
916.06	70.2438
917.18	70.05
918.29	69.8941
919.41	70.0238
920.53	69.9214
921.65	69.9781
922.77	69.9252
923.89	69.9715
925	70.0386
926.12	69.9727
927.24	70.0111
928.36	70.0195
929.47	70.0358
930.59	69.9594
931.71	70.1544
932.82	70.1328
933.94	69.9795
935.05	70.2384
936.17	69.9494
937.29	70.0687
938.4	70.2186
939.52	69.8998
940.63	70.0463
941.75	70.0819
942.86	70.0966
943.98	70.1635
945.09	70.1378
946.21	70.0403
947.32	69.7944
948.43	69.786
949.55	69.7424
950.66	69.811
951.78	69.8339
952.89	69.6546
954	69.7102
955.11	69.6235
956.23	69.7586
957.34	69.7059
958.45	69.7575
959.57	69.7022
960.68	69.7473
961.79	69.7311
962.9	69.6797
964.01	69.7156
965.12	69.7333
966.23	69.7354
967.34	69.727
968.46	69.7173
969.57	69.8238
970.68	69.7737
971.79	69.7301
972.9	69.6213
974.01	69.9403
975.12	69.7558
976.23	69.8192
977.33	69.8774
978.44	69.7581
979.55	69.8841
980.66	69.8784
981.77	69.9522
982.88	69.9164
983.99	69.9772
985.1	69.7236
986.2	69.8953
987.31	69.9221
988.42	69.8459
989.52	69.8976
990.63	69.9257
991.74	70.0674
992.85	69.8751
993.95	69.8537
995.06	69.8023
996.17	70.004
997.27	69.8965
998.38	69.8738
999.48	69.9411
1000.59	70.0567
1001.69	69.987
1002.8	69.9017
1003.9	69.9325
1005.01	69.9319
1006.11	69.8949
1007.22	70.1096
1008.32	70.0126
1009.43	69.9377
1010.53	69.9893
1011.63	69.8245
1012.74	69.8618
1013.84	69.9839
1014.94	70.0055
1016.05	70.0129
1017.15	69.8467
1018.25	69.9336
1019.36	69.9133
1020.46	69.9867
1021.56	69.8605
1022.66	69.7943
1023.76	69.886
1024.86	69.8421
1025.97	69.9168
1027.07	69.818
1028.17	69.9788
1029.27	69.9518
1030.37	70.0239
1031.47	69.9408
1032.57	69.8251
1033.67	69.952
1034.77	69.8885
1035.87	69.8693
1036.97	69.8175
1038.07	69.7696
1039.17	69.9005
1040.27	69.9582
1041.37	69.9168
1042.47	69.9081
1043.56	69.8668
1044.66	69.9832
1045.76	69.8806
1046.86	69.9931
1047.96	69.8083
1049.05	69.9039
1050.15	69.6891
1051.25	69.7143
1052.35	69.7994
1053.44	69.9864
1054.54	69.8277
1055.64	69.9741
1056.73	69.9433
1057.83	69.9267
1058.93	69.8815
1060.02	69.8766
1061.12	69.8092
1062.21	69.8448
1063.31	70.0827
1064.4	69.933
1065.5	69.9348
1066.59	69.7447
1067.69	70.0021
1068.78	69.9477
1069.88	70.0147
1070.97	69.9185
1072.07	70.0729
1073.16	70.0225
1074.25	70.0242
1075.35	70.0794
1076.44	69.9363
1077.53	69.9981
1078.62	69.9542
1079.72	69.9155
1080.81	69.9824
1081.9	69.9372
1083	69.8815
1084.09	69.9602
1085.18	69.9659
1086.27	70.192
1087.36	70.105
1088.45	70.0533
1089.54	69.9963
1090.64	70.1363
1091.73	70.0846
1092.82	70.1059
1093.91	70.0842
1095	70.1785
1096.09	70.1176
1097.18	70.0542
1098.27	69.8551
1099.36	70.0773
1100.45	70.0451
1101.54	70.0273
1102.62	70.089
1103.71	69.9891
1104.8	70.1865
1105.89	69.9221
1106.98	70.0505
1108.07	70.1774
1109.15	70.2275
1110.24	69.9645
1111.33	70.1006
1112.42	70.0606
1113.51	70.1002
1114.59	70.1763
1115.68	70.1794
1116.77	70.0964
1117.85	70.2429
1118.94	70.2956
1120.03	70.1082
1121.11	69.9978
1122.2	70.1783
1123.28	70.2218
1124.37	70.1245
1125.45	70.0375
1126.54	70.0419
1127.62	70.0216
1128.71	70.1459
1129.79	70.0499
1130.88	70.1182
1131.96	70.1239
1133.05	70.0422
1134.13	70.0806
1135.21	70.0302
1136.3	70.0906
1137.38	70.1185
1138.46	70.0603
1139.55	69.9069
1140.63	69.9152
1141.71	70.0592
1142.8	69.9671
1143.88	69.961
1144.96	69.9668
1146.04	70.0181
1147.12	69.9495
1148.21	69.9683
1149.29	69.987
1150.37	70.0762
1151.45	69.8745
1152.53	69.9207
1153.61	69.7986
1154.69	69.9753
1155.77	69.9184
1156.85	69.8667
1157.93	70.0159
1159.01	69.8821
1160.09	69.8408
1161.17	69.8244
1162.25	69.9006
1163.33	69.7367
1164.41	69.9368
1165.49	70.03
1166.57	69.8309
1167.65	69.8993
1168.72	69.8215
1169.8	69.8964
1170.88	70.0929
1171.96	69.8709
1173.04	70.0103
1174.11	69.8692
1175.19	69.8847
1176.27	69.7774
1177.35	69.8881
1178.42	69.8422
1179.5	69.7429
1180.58	69.8274
1181.65	69.766
1182.73	69.9561
1183.8	69.8764
1184.88	69.8723
1185.96	69.8186
1187.03	69.8615
1188.11	69.8977
1189.18	69.8715
1190.26	69.8922
1191.33	69.665
1192.41	69.91
1193.48	69.9138
1194.55	69.915
1195.63	70.0205
1196.7	69.7006
1197.78	69.7905
1198.85	69.9442
1199.92	69.6688
1201	70.0053
1202.07	69.8835
1203.14	69.7897
1204.22	69.7572
1205.29	69.7629
1206.36	69.7821
1207.43	69.7484
1208.5	69.7109
1209.58	69.8067
1210.65	69.7893
1211.72	70.0122
1212.79	69.8049
1213.86	69.8299
1214.93	69.8819
1216	69.8034
1217.07	69.9165
1218.15	69.7717
1219.22	69.8884
1220.29	69.9543
1221.36	69.915
1222.42	69.982
1223.49	69.7708
1224.56	69.8482
1225.63	69.9264
1226.7	69.8694
1227.77	69.9135
1228.84	69.8575
1229.91	69.8241
1230.98	69.8606
1232.05	69.8426
1233.11	69.8887
1234.18	69.9295
1235.25	69.8954
1236.32	69.9074
1237.38	69.9321
1238.45	69.8651
1239.52	69.9093
1240.59	69.9658
1241.65	69.9309
1242.72	69.9232
1243.79	69.9327
1244.85	69.9781
1245.92	70.0218
1246.98	70
1248.05	70.013
1249.11	70.0909
1250.18	70.0301
1251.24	70.132
1252.31	70.2228
1253.37	70.2613
1254.44	70.422
1255.5	70.4081
1256.57	70.496
1257.63	70.4478
1258.7	70.5423
1259.76	70.6712
1260.82	70.8066
1261.89	70.7325
1262.95	70.8779
1264.01	70.9477
1265.08	71.0112
1266.14	71.0721
1267.2	71.1799
1268.27	71.2775
1269.33	71.3047
1270.39	71.5269
1271.45	71.5771
1272.51	71.6162
1273.57	71.7719
1274.64	71.9216
1275.7	72.0123
1276.76	72.1133
1277.82	72.231
1278.88	72.3859
1279.94	72.6406
1281	72.7211
1282.06	72.9252
1283.12	73.0611
1284.18	73.1212
1285.24	73.2959
1286.3	73.5664
1287.36	73.7956
1288.42	73.9797
1289.48	74.1827
1290.54	74.3992
1291.6	74.6568
1292.65	74.9503
1293.71	75.2772
1294.77	75.5472
1295.83	75.8085
1296.89	76.0508
1297.95	76.3183
1299	76.7683
1300.06	77.1987
1301.12	77.5813
1302.17	77.9491
1303.23	78.4297
1304.29	78.9294
1305.34	79.3744
1306.4	79.8401
1307.46	80.4123
1307.75	80.7541
1308.81	81.1673
1309.87	81.6756
1310.93	82.5284
1311.99	83.1567
1313.05	83.9103
1314.12	84.3169
1315.18	85.1918
1316.24	85.6545
1317.3	86.3624
1318.36	86.9125
1319.42	87.8735
1320.48	88.3674
1321.54	88.954
1322.59	89.6581
1323.65	89.8376
1324.71	90.2534
1325.77	90.883
1326.83	91.0926
1327.89	91.5683
1328.95	91.5157
1330	91.5701
1331.06	91.6636
1332.12	91.564
1333.18	91.4879
1334.23	91.0023
1335.29	90.9496
1336.35	90.6792
1337.4	89.9
1338.46	89.4339
1339.52	88.9547
1340.57	88.3998
1341.63	87.6193
1342.69	86.8883
1343.74	86.3583
1344.8	86.1035
1345.85	85.1181
1346.91	84.8281
1347.96	83.9654
1349.02	83.3871
1350.07	82.7787
1351.13	82.0608
1352.18	81.5803
1353.24	81.092
1354.29	80.5006
1355.35	79.9784
1356.4	79.4379
1357.45	79.0722
1358.51	78.6334
1359.56	78.1829
1360.61	78.0024
1361.67	77.3001
1362.72	77.1236
1363.77	76.6835
1364.82	76.2852
1365.88	75.8751
1366.93	75.8107
1367.98	75.4854
1369.03	75.3519
1370.08	75.1009
1371.14	74.8683
1372.19	74.5443
1373.24	74.2934
1374.29	74.2473
1375.34	74.0133
1376.39	73.7806
1377.44	73.6901
1378.49	73.4522
1379.54	73.23
1380.59	73.176
1381.64	73.1873
1382.69	73.0342
1383.74	72.9633
1384.79	72.8819
1385.84	72.8945
1386.89	72.7022
1387.94	72.5361
1388.99	72.3894
1390.04	72.2507
1391.08	72.1746
1392.13	72.3541
1393.18	72.0966
1394.23	72.16
1395.28	71.9847
1396.32	72.0103
1397.37	71.9368
1398.42	71.9076
1399.47	71.7466
1400.51	71.7448
1401.56	71.7482
1402.61	71.5768
1403.65	71.562
1404.7	71.5093
1405.74	71.5153
1406.79	71.4535
1407.84	71.466
1408.88	71.5333
1409.93	71.2745
1410.97	71.3601
1412.02	71.4222
1413.06	71.3369
1414.11	71.339
1415.15	71.4206
1416.2	71.2962
1417.24	71.1927
1418.29	71.1217
1419.33	71.3051
1420.37	71.0645
1421.42	71.1305
1422.46	71.2983
1423.5	71.1112
1424.55	71.2164
1425.59	71.1363
1426.63	71.1122
1427.67	71.0543
1428.72	71.059
1429.76	71.2111
1430.8	71.0906
1431.84	71.0926
1432.89	71.186
1433.93	71.1907
1434.97	71.1132
1436.01	70.9887
1437.05	71.0795
1438.09	71.1376
1439.13	71.0979
1440.17	71.2252
1441.22	70.9964
1442.26	71.1576
1443.3	71.144
1444.34	71.3079
1445.38	71.1755
1446.41	71.1711
1447.45	71.1223
1448.49	71.183
1449.53	71.2464
1450.57	71.2471
1451.61	71.3653
1452.65	71.2199
1453.69	71.308
1454.73	71.207
1455.77	71.0564
1456.8	71.168
1457.84	71.2092
1458.88	71.313
1459.92	71.3921
1460.95	71.248
1461.99	71.2944
1463.03	71.3042
1464.07	71.3702
1465.1	71.1257
1466.14	71.5465
1467.18	71.405
1468.21	71.4384
1469.25	71.4312
1470.28	71.458
1471.32	71.5722
1472.36	71.4178
1473.39	71.4107
1474.43	71.4805
1475.46	71.4721
1476.5	71.3723
1477.53	71.6144
1478.57	71.4429
1479.6	71.5493
1480.64	71.6244
1481.67	71.4842
1482.7	71.4836
1483.74	71.6487
1484.77	71.5607
1485.81	71.5744
1486.84	71.6299
1487.87	71.6933
1488.9	71.8349
1489.94	71.8069
1490.97	71.7815
1492	72.0117
1493.04	71.8689
1494.07	71.8475
1495.1	71.8338
1496.13	71.8945
1497.16	72.1587
1498.2	72.0316
1499.23	72.104
1500.26	72.1647
1501.29	72.2033
1502.32	72.2953
1503.35	72.1211
1504.38	72.3592
1505.41	72.3247
1506.44	72.2497
1507.47	72.4696
1508.5	72.5342
1509.53	72.6327
1510.56	72.6008
1511.59	72.7293
1512.62	72.7534
1513.65	72.7776
1514.68	72.8787
1515.71	73.0125
1516.74	73.0444
1517.77	73.2395
1518.79	73.2975
1519.82	73.3152
1520.85	73.3967
1521.88	73.6766
1522.91	73.7946
1523.93	73.8409
1524.96	73.9342
1525.99	74.1723
1527.02	74.2812
1528.04	74.505
1529.07	74.7978
1530.1	74.9485
1531.12	75.1435
1532.15	75.216
1533.18	75.5114
1534.2	75.8825
1535.23	76.2275
1536.25	76.3561
1537.28	76.722
1538.31	77.037
1539.33	77.4381
1540.35	77.9436
1541.38	78.3199
1542.41	79.0211
1543.43	79.2969
1544.45	79.7555
1545.48	80.428
1546.5	80.8878
1547.53	81.5355
1548.55	82.1766
1549.57	83.0421
1550.6	83.6975
1551.62	84.49
1552.64	85.1481
1553.67	86.2523
1554.69	87.2574
1555.71	88.2455
1556.74	89.1893
1557.76	90.4097
1558.78	91.4186
1559.8	92.635
1560.82	93.3036
1561.85	94.3752
1562.87	95.3672
1563.89	96.5353
1564.91	97.4139
1565.93	98.0002
1566.95	98.7679
1567.97	99.4938
1568.99	99.8466
1570.01	99.8968
1571.03	100.165
1572.05	100.165
1573.07	100.083
1574.09	99.8653
1575.11	99.6716
1576.13	99.0082
1577.15	98.1753
1578.17	97.4936
1579.19	96.6854
1580.21	95.5772
1581.23	94.8525
1582.25	94.2426
1583.27	93.8753
1584.28	93.8655
1585.3	91.6589
1586.32	91.1469
1587.34	90.1678
1588.35	89.2917
1589.37	89.0302
1590.39	88.1776
1591.41	87.8951
1592.42	87.0883
1593.44	87.0354
1594.46	86.779
1595.47	86.3986
1596.49	86.2022
1597.51	85.9511
1598.52	85.5055
1599.54	85.6183
1600.55	85.4075
1601.57	85.1303
1602.59	85.5691
1603.6	85.8942
1604.62	85.6277
1605.63	85.8818
1606.65	84.5876
1607.66	83.0048
1608.67	82.5084
1609.69	82.0928
1610.7	81.5286
1611.72	80.7986
1612.73	80.4757
1613.75	79.8201
1614.76	79.4111
1615.77	78.9446
1616.78	78.5068
1617.8	78.1682
1618.81	77.5426
1619.82	77.1154
1620.84	76.5759
1621.85	76.2503
1622.86	75.9586
1623.87	75.5144
1624.89	75.1732
1625.9	74.9259
1626.91	74.5024
1627.92	74.3295
1628.93	74.0627
1629.94	73.7749
1630.95	73.5132
1631.96	73.4916
1632.98	73.2456
1633.99	73.3557
1635	73.0576
1636.01	72.7019
1637.02	72.743
1638.03	72.4747
1639.04	72.431
1640.05	72.408
1641.06	72.1359
1642.07	72.0112
1643.07	72.12
1644.08	71.9666
1645.09	71.9659
1646.1	71.8464
1647.11	71.6929
1648.12	71.6479
1649.13	71.6444
1650.13	71.6972
1651.14	71.4511
1652.15	71.2951
1653.16	71.4431
1654.16	71.3418
1655.17	71.2432
1656.18	71.1524
1657.19	71.1204
1658.19	71.1574
1659.2	71.2009
1660.2	70.9549
1661.21	71.1081
1662.22	70.9873
1663.22	70.9447
1664.23	70.7209
1665.24	70.9431
1666.24	70.7688
1667.25	70.7563
1668.25	70.9368
1669.26	70.7234
1670.26	70.7669
1671.27	70.7622
1672.27	70.6636
1673.28	70.5675
1674.28	70.6189
1675.28	70.7538
1676.29	70.6538
1677.29	70.6296
1678.3	70.4944
1679.3	70.5223
1680.3	70.6141
1681.31	70.5076
1682.31	70.4586
1683.31	70.3573
1684.32	70.3838
1685.32	70.3622
1686.32	70.5949
1687.32	70.3879
1688.32	70.3558
1689.33	70.4137
1690.33	70.3438
1691.33	70.4538
1692.33	70.2325
1693.33	70.3595
1694.33	70.3834
1695.34	70.4548
1696.34	70.4597
1697.34	70.818
1698.34	70.2015
1699.34	70.3037
1700.34	70.3198
1701.34	70.315
1702.34	70.1655
1703.34	70.1633
1704.34	70.2369
1705.34	70.2152
1706.34	70.3644
1707.34	70.3622
1708.34	70.2544
1709.33	70.2927
1710.33	70.2266
1711.33	70.3381
1712.33	70.3264
1713.33	70.3159
1714.33	70.1829
1715.32	70.1724
1716.32	70.2807
1717.32	70.2246
1718.32	70.3368
1719.32	70.0954
1720.31	70.2024
1721.31	70.0628
1722.31	70.1528
1723.3	70.1594
1724.3	70.1189
1725.3	70.1789
1726.29	70.0446
1727.29	70.1515
1728.29	70.0498
1729.28	69.9976
1730.28	70.0459
1731.27	69.9284
1732.27	70.1828
1733.26	70.1411
1734.26	70.0863
1735.25	70.0511
1736.25	70.1789
1737.24	70.1802
1738.24	70.1176
1739.23	70.1058
1740.23	70.1372
1741.22	70.2076
1742.21	70.0054
1743.21	70.0158
1744.2	70.2089
1745.19	70.0941
1746.19	70.1984
1747.18	70.0445
1748.17	70.0054
1749.17	69.9962
1750.16	70.0119
1751.15	70.0054
1752.14	70.0693
1753.13	70.158
1754.13	70.0928
1755.12	70.1175
1756.11	70.111
1757.1	70.1554
1758.09	69.961
1759.09	70.0393
1760.08	70.0719
1761.07	69.9062
1762.06	70.0223
1763.05	69.9506
1764.04	70.0053
1765.03	70.1175
1766.02	70.0262
1767.01	70.0158
1768	70.0562
1768.99	70.0875
1769.98	69.8866
1770.97	70.0418
1771.96	70.0666
1772.95	70.0536
1773.93	70.0679
1774.92	70.0053
1775.91	69.9453
1776.9	69.9283
1777.89	69.8931
1778.88	69.9062
1779.87	69.854
1780.85	69.9779
1781.84	70.0131
1782.83	69.717
1783.82	69.8696
1784.8	69.9753
1785.79	69.9975
1786.78	70.0118
1787.77	69.9322
1788.75	69.897
1789.74	69.8566
1790.72	69.8174
1791.71	69.8644
1792.7	69.9114
1793.68	69.7796
1794.67	70.0522
1795.65	69.9557
1796.64	70.0744
1797.63	70.1018
1798.61	70.0053
1799.6	69.8839
1800.58	69.8931
1801.57	69.9766
1802.55	69.9544
1803.53	70.0274
1804.52	70.2283
1805.5	70.1292
1806.49	70.0353
1807.47	70.0627
1808.45	69.9753
1809.44	70.0144
1810.42	69.8644
1811.4	69.8683
1812.39	70.0026
1813.37	70.0626
1814.35	69.9909
1815.34	70.0639
1816.32	69.9439
1817.3	70.0078
1818.28	69.9922
1819.27	70.1122
1820.25	70.0248
1821.23	69.9778
1822.21	70.0535
1823.19	69.9674
1824.17	69.8943
1825.15	70
1826.14	69.8434
1827.12	69.932
1828.1	69.8602
1829.08	69.9449
1830.06	69.9148
1831.04	70.0347
1832.02	69.989
1833	69.9223
1833.98	70.0606
1834.96	69.8987
1835.94	70.0748
1836.92	70.0068
1837.9	70.0785
1838.87	69.9975
1839.85	70.0392
1840.83	69.9099
1841.81	69.906
1842.79	70.0376
1843.77	69.9292
1844.74	69.9161
1845.72	70.0608
1846.7	69.8546
1847.68	70.0501
1848.66	70.1048
1849.63	69.9794
1850.61	69.9142
1851.59	70.0223
1852.57	69.9427
1853.54	69.9021
1854.52	70.0089
1855.5	69.8888
1856.47	69.9709
1857.45	70.0125
1858.42	70.0528
1859.4	70.0892
1860.37	69.9665
1861.35	69.8738
1862.33	70.0054
1863.3	69.9792
1864.28	69.9165
1865.25	69.9163
1866.23	69.9632
1867.2	69.9122
1868.18	69.9199
1869.15	70.0698
1870.12	70.0254
1871.1	70.0447
1872.07	70.0289
1873.05	69.9441
1874.02	70.1474
1874.99	69.8903
1875.97	69.928
1876.94	70.0087
1877.91	69.8638
1878.89	69.8389
1879.86	69.8765
1880.83	69.8699
1881.8	69.9454
1882.78	69.94
1883.75	69.9778
1884.72	69.8668
1885.69	69.9905
1886.66	70.036
1887.64	69.9902
1888.61	69.9875
1889.58	70.1921
1890.55	70.0785
1891.52	70.0091
1892.49	70.1903
1893.46	70.0101
1894.43	70.0491
1895.4	69.8794
1896.37	70.0475
1897.34	69.9404
1898.31	70.1424
1899.28	69.8657
1900.25	70.0612
1901.22	69.9267
1902.19	69.9317
1903.16	70.0163
1904.13	69.8923
1905.1	70.0304
1906.07	69.9715
1907.04	69.9622
1908	70.1081
1908.97	70.0388
1909.94	69.9643
1910.91	70.0306
1911.88	69.9483
1912.84	69.8685
1913.81	70.0927
1914.78	70.0247
1915.75	70.121
1916.71	70.0569
1917.68	70.0737
1918.65	70.1217
1919.61	70.0903
1920.58	70.1475
1921.55	70.0534
1922.51	70.2345
1923.48	70.1065
1924.44	70.1493
1925.41	70.2066
1926.38	70.1581
1927.34	70.1331
1928.31	70.2137
1929.27	70.194
1930.24	70.1155
1931.2	70.1649
1932.17	70.1556
1933.13	70.2023
1934.1	70.2034
1935.06	70.245
1936.03	70.1221
1936.99	70.2158
1937.95	70.32
1938.92	70.175
1939.88	70.3052
1940.84	70.1693
1941.81	70.25
1942.77	70.1415
1943.73	70.2887
1944.7	70.2493
1945.66	70.2844
1946.62	70.2698
1947.58	70.2317
1948.55	70.2994
1949.51	70.1973
1950.47	70.4202
1951.43	70.3299
1952.39	70.2945
1953.36	70.2747
1954.32	70.3384
1955.28	70.419
1956.24	70.3875
1957.2	70.3403
1958.16	70.3414
1959.12	70.2537
1960.08	70.4075
1961.04	70.4072
1962	70.3339
1962.96	70.3859
1963.92	70.3686
1964.88	70.2484
1965.84	70.3669
1966.8	70.2492
1967.76	70.4029
1968.72	70.3635
1969.68	70.2472
1970.64	70.2664
1971.6	70.3054
1972.56	70.3703
1973.51	70.267
1974.47	70.4598
1975.43	70.3826
1976.39	70.4111
1977.35	70.4265
1978.31	70.5788
1979.26	70.4559
1980.22	70.4922
1981.18	70.4267
1982.14	70.5856
1983.09	70.3427
1984.05	70.5746
1985.01	70.4072
1985.96	70.5374
1986.92	70.3167
1987.88	70.3531
1988.83	70.4337
1989.79	70.4035
1990.74	70.4881
1991.7	70.4592
1992.65	70.2933
1993.61	70.3909
1994.56	70.3412
1995.52	70.3827
1996.47	70.4895
1997.43	70.5206
1998.38	70.4225
1999.34	70.438
2000.29	70.6269
2001.25	70.3919
2002.2	70.4386
2003.16	70.4449
2004.11	70.4747
2005.06	70.3389
2006.02	70.5017
2006.97	70.3893
2007.92	70.4217
2008.88	70.3067
2009.83	70.3939
2010.78	70.3859
2011.74	70.4626
2012.69	70.4285
2013.64	70.4857
2014.59	70.5207
2015.55	70.4109
2016.5	70.3428
2017.45	70.5031
2018.4	70.3881
2019.35	70.4896
2020.3	70.4424
2021.26	70.394
2022.21	70.4094
2023.16	70.1652
2024.11	70.3411
2025.06	70.4479
2026.01	70.3329
2026.96	70.2935
2027.91	70.4068
2028.86	70.1979
2029.81	70.3085
2030.76	70.3814
2031.71	70.4999
2032.66	70.3496
2033.61	70.3129
2034.56	70.3075
2035.51	70.3946
2036.46	70.3827
2037.4	70.3016
2038.35	70.2701
2039.3	70.4003
2040.25	70.3388
2041.2	70.3125
2042.15	70.3109
2043.09	70.3407
2044.04	70.3679
2044.99	70.2438
2045.94	70.2266
2046.88	70.242
2047.83	70.4283
2048.78	70.389
2049.73	70.3235
2050.67	70.3638
2051.62	70.147
2052.57	70.1742
2053.51	70.3149
2054.46	70.1464
2055.4	70.2831
2056.35	70.3546
2057.3	70.327
2058.24	70.3581
2059.19	70.2353
2060.13	70.2598
2061.08	70.2453
2062.02	70.2672
2062.97	70.2657
2063.91	70.2381
2064.86	70.1361
2065.8	70.2676
2066.75	70.2009
2067.69	70.2685
2068.63	70.2396
2069.58	70.2655
2070.52	70.2404
2071.47	70.248
2072.41	70.2322
2073.35	70.1941
2074.3	70.1821
2075.24	70.2719
2076.18	70.2913
2077.13	70.1867
2078.07	70.2034
2079.01	70.2476
2079.95	70.2786
2080.9	70.3123
2081.84	70.2769
2082.78	70.201
2083.72	70.249
2084.66	70.1627
2085.6	70.1312
2086.55	70.2366
2087.49	70.1125
2088.43	70.1097
2089.37	70.2138
2090.31	70.1262
2091.25	70.2551
2092.19	70.1453
2093.13	70.055
2094.07	70.2427
2095.01	70.0911
2095.95	70.1183
2096.89	70.165
2097.83	70.1439
2098.77	70.1228
2099.71	70.1461
2100.65	70.1876
2101.59	70.2147
2102.53	70.1819
2103.47	70.2052
2104.41	70.1201
2105.34	70.133
2106.28	70.1406
2107.22	70.1886
2108.16	70.2392
2109.1	70.196
2110.03	70.1005
2110.97	70.1277
2111.91	70.0844
2112.85	70.1846
2113.78	70.1322
2114.72	70.1868
2115.66	70
2116.59	70.1706
2117.53	70.0815
2118.47	70.136
2119.4	69.9765
2120.34	70.0492
2121.28	70.1363
2122.21	70.1855
2123.15	70.2596
2124.08	70.1418
2125.02	70.1833
2125.96	70.2077
2126.89	70.1278
2127.83	70.1274
2128.76	70.1529
2129.7	70.0734
2130.63	70.1981
2131.57	69.9999
2132.5	70.1472
2133.43	70.1639
2134.37	70.1697
2135.3	70.1771
2136.24	70.1879
2137.17	70.1454
2138.1	70.1329
2139.04	70.1299
2139.97	70.0908
2140.9	70.0695
2141.84	70.0616
2142.77	70.2094
2143.7	70.1729
2144.64	70.1225
2145.57	70.1973
2146.5	70.1104
2147.43	70.1032
2148.36	70.1157
2149.3	70.1463
2150.23	70.231
2151.16	70.1855
2152.09	70.1013
2153.02	70.1095
2153.95	70.1674
2154.89	70.0334
2155.82	70.1
2156.75	70.1741
2157.68	70.1256
2158.61	70.0411
2159.54	70.1808
2160.47	70.2075
2161.4	70.1317
2162.33	70.1817
2163.26	70.1686
2164.19	70.1397
2165.12	70.1665
2166.05	70.1664
2166.98	70.1208
2167.91	70.0782
2168.83	70.0613
2169.76	70.1201
2170.69	70.1477
2171.62	70.1606
2172.55	70.1175
2173.48	70.1447
2174.41	70.0931
2175.33	70.205
2176.26	70.2419
2177.19	70.1325
2178.12	70.1109
2179.04	70.1779
2179.97	70.14
2180.9	70.1808
2181.83	70.1795
2182.75	70.1883
2183.68	70.2183
2184.61	70.1488
2185.53	70.1518
2186.46	70.2328
2187.39	70.232
2188.31	70.1587
2189.24	70.1659
2190.16	70.2556
2191.09	70.2331
2192.01	70.198
2192.94	70.1737
2193.86	70.2076
2194.79	70.1972
2195.72	70.2079
2196.64	70.2415
2197.56	70.3362
2198.49	70.276
2199.41	70.2667
2200.34	70.2107
2201.26	70.2645
2202.19	70.2572
2203.11	70.2823
2204.03	70.3242
2204.96	70.3169
2205.88	70.3046
2206.8	70.2461
2207.73	70.2824
2208.65	70.2752
2209.57	70.3175
2210.5	70.2909
2211.42	70.3636
2212.34	70.4059
2213.26	70.321
2214.18	70.311
2215.11	70.2847
2216.03	70.2353
2216.95	70.283
2217.87	70.2497
2218.79	70.2546
2219.71	70.3741
2220.64	70.3102
2221.17	70.3171
2222.09	70.4191
2223.02	70.3362
2223.94	70.3145
2224.87	70.3582
2225.8	70.2413
2226.72	70.3646
2227.65	70.3182
2228.57	70.2562
2229.5	70.3024
2230.42	70.196
2231.34	70.181
2232.27	70.3081
2233.19	70.1339
2234.12	70.2506
2235.04	70.2616
2235.96	70.2792
2236.89	70.0997
2237.81	70.2543
2238.74	70.1309
2239.66	70.2946
2240.58	70.0591
2241.51	70.2697
2242.43	70.3473
2243.35	70.2761
2244.27	70.1841
2245.2	70.1808
2246.12	70.201
2247.04	70.1468
2247.96	70.0965
2248.88	70.118
2249.81	70.1186
2250.73	70.0501
2251.65	70.1368
2252.57	70.2274
2253.49	70.0911
2254.41	70.1921
2255.34	70.1184
2256.26	69.9768
2257.18	70.1157
2258.1	70.2116
2259.02	70.087
2259.94	70.1581
2260.86	70.0282
2261.78	70.0758
2262.7	70.0842
2263.62	70.0875
2264.54	70.0555
2265.46	70.2048
2266.38	70.0972
2267.3	70.0365
2268.21	70.212
[truncated: 1,261 more rows]
