# Supplementary material for: Down/up conversion luminescence of erbium-ytterbium co-deposited nanoparticles on carbon nanotubes via a microwave-assisted method
Source: PeerJ journal article supplement (doi:10.7717/peerj-matsci.33), 2025-03-07
Supplement: Figure6.zip [file Figure6.zip]

## Sheet: Hoja1
490.74	21.4598
490.889	26.6531
491.038	22.0942
491.186	12.0621
491.335	2.99688
491.484	-0.14916
491.632	-6.02241
491.781	-14.1684
491.93	-22.86
492.078	-31.915
492.227	-40.4247
492.376	-45.7526
492.524	-50.0804
492.673	-54.9536
492.822	-58.4633
492.97	-60.9729
493.119	-63.7552
493.268	-65.9013
493.417	-67.2291
493.565	-68.1932
493.714	-68.3393
493.863	-68.2125
494.011	-68.7221
494.16	-68.7772
494.309	-67.6505
494.457	-65.7055
494.606	-64.4879
494.755	-64.0884
494.904	-63.8707
495.052	-62.1076
495.201	-60.4354
495.35	-57.8541
495.499	-55.3637
495.647	-54.146
495.796	-52.1102
495.945	-50.2561
496.093	-49.493
496.242	-48.1844
496.391	-45.5122
496.54	-43.3855
496.688	-43.2587
496.837	-41.4047
496.986	-40.7324
497.135	-40.9692
497.283	-38.5697
497.432	-36.6248
497.581	-33.9525
497.73	-32.5529
497.879	-32.0625
498.027	-32.2994
498.176	-32.718
498.325	-33.1366
498.474	-34.9189
498.622	-35.1558
498.771	-34.3017
498.92	-35.4476
499.069	-37.4117
499.218	-39.4667
499.366	-40.3399
499.515	-40.3949
499.664	-41.359
499.813	-42.7776
499.962	-41.9235
500.11	-41.6149
500.259	-43.3972
500.408	-45.7249
500.557	-47.8708
500.706	-47.5621
500.854	-48.2535
501.003	-50.9449
501.152	-53.9999
501.301	-55.873
501.45	-55.928
501.598	-57.1648
501.747	-57.2198
501.896	-56.2748
502.045	-55.5116
502.194	-53.8393
502.343	-53.7125
502.491	-53.0401
502.64	-50.0041
502.789	-46.8773
502.938	-44.9323
503.087	-43.7145
503.236	-42.7695
503.385	-42.0062
503.533	-42.2429
503.682	-42.9342
503.831	-43.4436
503.98	-42.7714
504.129	-41.3718
504.278	-40.7904
504.427	-41.6635
504.576	-40.9002
504.724	-39.8642
504.873	-40.5555
505.022	-39.7013
505.171	-38.1199
505.32	-35.8113
505.469	-31.5026
505.618	-28.4666
505.767	-22.1579
505.915	-15.3946
506.064	-14.2677
506.213	-13.5044
506.362	-12.6502
506.511	-10.6142
506.66	-10.2146
506.809	-9.63313
506.958	-8.23349
507.107	-10.0157
507.256	-11.8888
507.405	-17.3073
507.553	-22.4531
507.702	-20.0535
507.851	-18.1084
508	-17.436
508.149	-16.0364
508.298	-15.0913
508.447	-14.5097
508.596	-14.7464
508.745	-13.983
508.894	-13.5833
509.043	-12.9109
509.192	-11.4204
509.341	-11.8389
509.49	-11.6211
509.639	-10.676
509.787	-10.2764
509.936	-9.05856
510.085	-7.29529
510.234	-4.71383
510.383	-3.13237
510.532	-0.82364
510.681	1.12153
510.83	1.70307
510.979	3.73915
511.128	5.68432
511.277	8.17495
511.426	10.3019
511.575	11.7926
511.724	12.7377
511.873	13.1375
512.022	14.5372
512.171	15.6642
512.32	16.7002
512.469	18.4636
512.618	21.136
512.767	23.8085
512.916	26.1173
513.065	29.3352
513.214	33.644
513.363	38.771
513.512	45.0798
513.661	52.2068
513.81	58.7883
513.959	65.7335
514.108	72.7696
514.257	79.6239
514.406	86.7508
514.555	94.6051
514.704	103.368
514.853	110.223
515.002	115.713
515.151	120.84
515.3	125.149
515.449	129.458
515.598	132.858
515.747	137.076
515.896	141.384
516.045	144.875
516.194	148.639
516.343	151.856
516.492	156.529
516.641	162.292
516.791	168.42
516.94	175.274
517.089	182.492
517.238	189.892
517.387	196.837
517.536	204.237
517.685	211.636
517.834	219.309
517.983	228.981
518.132	239.472
518.281	250.872
518.43	262.09
518.579	272.944
518.728	285.798
518.877	301.289
519.026	318.416
519.176	334.907
519.325	353.67
519.474	375.252
519.623	396.288
519.772	418.415
519.921	442.724
520.07	468.669
520.219	496.614
520.368	527.287
520.517	559.687
520.666	593.632
520.816	631.85
520.965	672.977
521.114	716.013
521.263	764.14
521.412	815.722
521.561	869.758
521.71	928.249
521.859	988.921
522.008	1047.14
522.158	1100.45
522.307	1149.3
522.456	1190.98
522.605	1221.65
522.754	1240.68
522.903	1248.63
523.052	1244.12
523.201	1227.16
523.351	1196.92
523.5	1155.96
523.649	1109.36
523.798	1060.39
523.947	1009.25
524.096	959.101
524.245	913.955
524.395	872.628
524.544	834.936
524.693	801.973
524.842	774.599
524.991	754.4
525.14	739.739
525.289	729.16
525.439	720.847
525.588	715.162
525.737	710.741
525.886	707.676
526.035	707.422
526.184	708.797
526.334	714.164
526.483	723.75
526.632	740.517
526.781	767.194
526.93	803.689
527.079	852.002
527.229	915.317
527.378	996.903
527.527	1099.22
527.676	1223.71
527.825	1371.3
527.974	1538.61
528.124	1717.83
528.273	1896.51
528.422	2059.73
528.571	2199.04
528.72	2309.18
528.87	2380.12
529.019	2408.98
529.168	2394.93
529.317	2338.06
529.466	2237.92
529.616	2098.6
529.765	1930.09
529.914	1741.59
530.063	1549.08
530.212	1360.3
530.362	1181.89
530.511	1022.38
530.66	881.242
530.809	758.555
530.959	652.231
531.108	562.906
531.257	489.674
531.406	429.442
531.555	380.118
531.705	337.884
531.854	304.652
532.003	278.238
532.152	255.459
532.302	235.862
532.451	219.264
532.6	205.487
532.749	192.344
532.899	180.838
533.048	168.877
533.197	157.918
533.346	149.321
533.496	139.814
533.645	130.672
533.794	121.894
533.943	114.842
534.093	109.063
534.242	103.648
534.391	98.7794
534.54	93.4551
534.69	89.1307
534.839	85.6245
534.988	82.1195
535.137	79.7041
535.287	78.4707
535.436	78.6008
535.585	77.6401
535.734	74.6793
535.884	71.9913
536.033	68.1214
536.182	62.1607
536.332	55.6545
536.481	52.2392
536.63	51.9136
536.779	50.8619
536.929	49.3557
537.078	47.8495
537.227	47.1615
537.377	47.5644
537.526	48.24
537.675	50.278
537.824	54.1355
537.974	59.3565
538.123	61.3958
538.272	60.2532
538.422	59.8379
538.571	59.059
538.72	56.8243
538.869	54.6817
539.019	53.8119
539.168	52.8499
539.317	52.6165
539.467	52.7466
539.616	52.421
539.765	52.2773
539.915	51.1347
540.064	49.2648
540.213	47.0302
540.363	46.3421
540.512	47.0177
540.661	46.9649
540.81	45.9132
540.96	43.2252
541.109	41.0814
541.258	40.9389
541.408	40.7054
541.557	41.3798
541.706	42.5088
541.856	44.2753
542.005	46.9497
542.154	46.715
542.304	45.027
542.453	44.7014
542.602	45.9213
542.752	42.0514
542.901	36.544
543.05	35.2184
543.2	32.7111
543.349	31.6582
543.498	30.4235
543.648	27.5525
543.797	28.0451
543.947	28.9922
544.096	28.303
544.245	26.0683
544.395	28.5609
544.544	32.0535
544.693	31.7279
544.843	31.949
544.992	32.2598
545.141	33.6615
545.291	35.3359
545.44	35.1921
545.589	36.3211
545.739	39.45
545.888	41.7608
546.038	42.7989
546.187	43.1097
546.336	43.2386
546.486	43.8221
546.635	44.2238
546.784	43.7164
546.934	43.209
547.083	41.4289
547.232	37.2851
547.382	33.1413
547.531	32.9976
547.681	33.6708
547.83	33.8907
547.979	33.9287
548.129	36.0565
548.278	37.8218
548.428	35.9508
548.577	33.7161
548.726	33.3905
548.876	35.2456
549.025	35.1057
549.174	33.0132
549.324	32.6973
549.473	31.7932
549.623	31.2091
549.772	28.4016
549.922	25.096
550.071	26.2022
550.22	27.2668
550.37	28.6515
550.519	29.7218
550.669	30.9265
550.818	33.4047
550.967	35.0648
551.117	36.5422
551.266	37.9295
551.416	41.4069
551.565	45.6124
551.714	48.9088
551.864	53.3862
552.013	58.0463
552.163	63.0691
552.312	69.2746
552.461	75.9338
552.611	84.9566
552.76	95.9803
552.91	108.094
553.059	119.209
553.209	129.686
553.358	140.527
553.507	150.55
553.657	160.3
553.806	169.869
553.956	178.165
554.105	185.279
554.255	189.575
554.404	191.507
554.553	191.348
554.703	189.371
554.852	187.485
555.002	185.417
555.151	182.714
555.301	177.827
555.45	172.396
555.599	168.327
555.749	163.896
555.898	159.191
556.048	154.396
556.197	151.692
556.347	151.442
556.496	150.92
556.646	151.397
556.795	152.42
556.944	155.716
557.094	160.92
557.243	165.943
557.393	169.148
557.542	173.807
557.692	180.012
557.841	184.307
557.991	189.148
558.14	194.444
558.29	199.921
558.439	208.035
558.588	216.603
558.738	224.899
558.887	235.649
559.037	251.126
559.186	266.967
559.336	284.717
559.485	308.921
559.635	336.58
559.784	368.967
559.934	405.444
560.083	447.285
560.233	498.035
560.382	556.603
560.531	624.081
560.681	701.831
560.83	792.945
560.98	897.695
561.129	1011.9
561.279	1138.38
561.428	1275.67
561.578	1419.97
561.727	1567.26
561.877	1713.01
562.026	1850.67
562.176	1975.78
562.325	2082.71
562.475	2160.92
562.624	2207.4
562.774	2223.6
562.923	2207.08
563.073	2158.01
563.222	2080.49
563.372	1974.87
563.521	1846.89
563.671	1706.64
563.82	1557.58
563.97	1405.78
564.119	1258.8
564.269	1121.1
564.418	994.301
564.568	879.778
564.717	778.437
564.867	689.551
565.016	616.936
565.166	556.595
565.315	504.89
565.465	461.095
565.614	424.117
565.764	396.776
565.913	376.889
566.063	361.821
566.212	349.115
566.362	339.774
566.511	334.433
566.661	330.637
566.81	328.659
566.96	328.5
567.109	329.977
567.259	331.818
567.408	334.113
567.558	336.59
567.707	338.157
567.857	339.453
568.006	341.111
568.156	345.679
568.305	350.065
568.455	354.724
568.604	360.473
568.754	366.133
568.903	372.7
569.053	381.541
569.202	388.29
569.352	390.04
569.501	392.79
569.651	393.448
569.8	389.47
569.95	385.583
570.099	381.423
570.249	375.354
570.399	368.194
570.548	357.58
570.698	341.329
570.847	326.26
570.997	315.646
571.146	302.122
571.296	288.872
571.445	277.803
571.595	266.372
571.744	253.757
571.894	242.144
572.043	230.711
572.193	219.46
572.342	210.028
572.492	200.504
572.641	190.435
572.791	181.73
572.941	174.661
573.09	167.137
573.24	158.432
573.389	148.903
573.539	139.777
573.688	132.51
573.838	127.647
573.987	122.641
574.137	116.131
574.286	110.023
574.436	105.593
574.586	99.9286
574.735	94.305
574.885	90.3573
575.034	87.6372
575.184	86.6444
575.333	85.8334
575.483	85.2951
575.632	84.9387
575.782	85.4913
575.931	87.3167
576.081	90.233
576.231	95.7856
576.38	100.975
576.53	105.436
576.679	110.989
576.829	113.996
576.978	115.731
577.128	118.283
577.277	121.109
577.427	124.661
577.576	126.668
577.726	128.767
577.876	131.046
578.025	131.599
578.175	132.152
578.324	134.068
578.474	136.984
578.623	141.537
578.773	145.999
578.922	149.46
579.072	154.377
579.222	159.838
579.371	162.482
579.521	162.671
579.67	164.042
579.82	165.504
579.969	163.602
580.119	158.245
580.268	149.161
580.418	139.623
580.568	130.085
580.717	117.365
580.867	105.008
581.016	93.4702
581.166	82.1137
581.315	69.2118
581.465	55.5826
581.615	44.3171
581.764	37.597
581.914	33.6951
582.063	29.5205
582.213	26.8913
582.362	23.5348
582.512	19.3602
582.662	15.6401
582.811	12.4655
582.961	12.6545
583.11	13.389
583.26	12.6689
583.409	10.767
583.559	8.41053
583.709	6.69045
583.858	4.97036
584.008	4.97755
584.157	5.71201
584.307	6.7192
584.456	7.27184
584.606	7.55176
584.756	9.19531
584.905	11.7479
585.055	13.6642
585.204	14.4896
585.354	16.0422
585.503	17.3222
585.653	17.6021
585.803	16.9729
585.952	16.4346
586.102	16.8055
586.251	16.0854
586.401	14.7289
586.55	14.7361
586.7	15.5615
586.85	16.9323
586.999	17.3031
587.149	16.7649
587.298	16.3175
587.448	16.5974
587.597	16.4228
587.747	16.1573
587.897	16.7099
588.046	17.808
588.196	16.9061
588.345	15.3678
588.495	14.375
588.645	13.2913
588.794	13.0258
588.944	13.2148
589.093	14.4947
589.243	15.5019
589.392	16.1454
589.542	16.789
589.692	16.7962
589.841	16.9852
589.991	18.5378
590.14	19.8177
590.29	22.0976
590.44	24.4685
590.589	26.2938
590.739	27.4828
590.888	28.3082
591.038	29.2245
591.187	28.8681
591.337	29.8752
591.487	30.6097
591.636	30.2533
591.786	32.9877
591.935	33.6313
592.085	31.8203
592.235	31.1002
592.384	30.1074
592.534	30.5691
592.683	31.9399
592.833	33.8562
592.982	34.4998
593.132	34.3251
593.282	34.1505
593.431	31.7032
593.581	29.7103
593.73	30.8084
593.88	31.452
594.03	32.9137
594.179	34.7391
594.329	35.2008
594.478	36.1238
594.628	37.3387
594.778	40.1181
594.927	42.9168
595.077	45.1892
595.226	47.3898
595.376	48.4277
595.525	50.303
595.675	53.1065
595.825	54.9293
595.974	57.4984
596.124	59.8073
596.273	59.8434
596.423	60.3341
596.573	59.9156
596.722	58.3153
596.872	58.6242
597.021	60.3875
597.171	60.9692
597.32	59.3689
597.47	59.8595
597.62	60.8047
597.769	60.2044
597.919	60.9679
598.068	60.913
598.218	61.4947
598.368	63.8945
598.517	65.476
598.667	65.1486
598.816	66.821
598.966	70.4026
599.116	71.7114
599.265	72.6565
599.415	75.0564
599.564	77.2742
599.714	79.8559
599.863	83.5283
600.013	85.6553
600.163	86.6005
600.312	87.273
600.462	87.5819
600.611	87.4361
600.761	87.2905
600.911	87.0539
601.06	86.6354
601.21	87.5807
601.359	88.344
601.509	87.562
601.659	87.7799
601.808	88.2705
601.958	89.7613
602.107	91.9791
602.257	95.1971
602.406	98.9605
602.556	102.815
602.706	106.396
602.855	106.705
603.005	105.923
603.154	108.05
603.304	111.177
603.454	115.85
603.603	121.249
603.753	123.74
603.902	124.776
604.052	126.176
604.201	127.485
604.351	129.703
604.501	132.739
604.65	137.411
604.8	141.902
604.949	144.574
605.099	145.792
605.249	145.647
605.398	145.955
605.548	146.901
605.697	148.21
605.847	149.882
605.997	151.555
606.146	156.227
606.296	160.263
606.445	162.39
606.595	166.517
606.744	170.462
606.894	176.589
607.044	183.989
607.193	189.48
607.343	194.698
607.492	199.552
607.642	204.497
607.792	208.988
607.941	212.478
608.091	215.696
608.24	218.642
608.39	221.769
608.539	222.826
608.689	224.416
608.839	227.36
608.988	229.323
609.138	232.214
609.287	232.642
609.437	230.936
609.586	230.317
609.736	229.629
609.886	229.565
610.035	229.436
610.185	228.531
610.334	226.061
610.484	223.763
610.633	221.063
610.783	216.215
610.933	213.84
611.082	213.672
611.232	213.907
611.381	212.359
611.531	209.818
611.68	209.579
611.83	211.31
611.98	214.315
612.129	215.437
612.279	218.242
612.428	224.794
612.578	230.717
612.727	235.786
612.877	240.414
613.027	247.213
613.176	253.592
613.326	257.64
613.475	261.081
613.625	265.295
613.774	271.668
613.924	277.05
614.074	281.116
614.223	285.2
614.373	289.078
614.522	295.127
614.672	301.374
614.821	307.575
614.971	316.112
615.121	324.723
615.27	332.654
615.42	340.58
615.569	348.99
615.719	357.596
615.868	367.671
616.018	379.103
616.168	390.629
616.317	403.026
616.467	417.606
616.616	429.692
616.766	439.061
616.915	448.607
617.065	457.698
617.214	466.871
617.364	475.311
617.514	482.417
617.663	487.97
617.813	488.698
617.962	486.605
618.112	481.812
618.261	476.532
618.411	472.146
618.56	464.453
618.71	454.974
618.86	443.73
619.009	431.552
619.159	417.608
619.308	403.105
619.458	390.512
619.607	377.994
619.757	364.703
619.906	350.613
620.056	337.301
620.206	325.466
620.355	314.33
620.505	303.1
620.654	291.048
620.804	279.527
620.953	268.146
621.103	256.156
621.252	244.833
621.402	235.061
621.551	225.419
621.701	214.846
621.851	203.972
622	193.696
622.15	185.486
622.299	177.965
622.449	171.642
622.598	167.508
622.748	164.525
622.897	161.586
623.047	159.153
623.196	157.841
623.346	157.17
623.495	157.824
623.645	159.536
623.794	160.892
623.944	162.096
624.094	162.986
624.105	162.199
624.254	160.741
624.404	160.842
624.553	159.463
624.702	158.189
624.851	160.024
625.001	161.696
625.15	160.368
625.299	157.677
625.449	157.258
625.598	155.384
625.747	153.147
625.896	152.183
626.046	148.855
626.195	147.254
626.344	146.745
626.494	142.417
626.643	138.998
626.792	139.761
626.941	140.706
627.091	141.105
627.24	143.777
627.389	144.722
627.539	145.03
627.688	147.339
627.837	148.283
627.987	148.717
628.136	151.062
628.285	153.136
628.435	152.578
628.584	152.203
628.733	150.649
628.883	149.008
629.032	148.732
629.181	147.822
629.331	146.643
629.48	144.83
629.629	143.349
629.779	140.414
629.928	136.114
630.077	133.724
630.227	133.244
630.376	132.036
630.525	131.1
630.675	131.71
630.824	130.775
630.973	127.203
631.123	124.994
631.272	124.332
631.422	124.305
631.571	124.552
631.72	122.98
631.87	120.135
632.019	118.654
632.168	116.537
632.318	113.329
632.467	111.666
632.616	112.185
632.766	112.34
632.915	111.132
633.065	111.469
633.214	111.26
633.363	109.416
633.513	106.025
633.662	101.726
633.812	96.8811
633.961	92.4911
634.11	90.5555
634.26	88.0741
634.409	85.775
634.559	83.6572
634.708	80.6308
634.857	79.0589
635.007	79.1229
635.156	80.2783
635.306	82.0696
635.455	83.1341
635.604	82.9254
635.754	80.5349
635.903	78.8721
636.053	78.027
636.202	76.5461
636.352	75.1556
636.501	74.8559
636.65	75.6472
636.8	76.8022
636.949	76.9576
637.099	79.2034
637.248	82.3588
637.398	82.7865
637.547	81.8505
637.696	80.0054
637.846	77.9786
637.995	74.8608
638.145	72.6521
638.294	69.4438
638.444	64.8715
638.593	61.481
638.743	55.6359
638.892	49.7
639.041	48.1276
639.191	47.0098
639.34	45.8011
639.49	43.6833
639.639	43.9292
639.789	43.9932
639.938	43.5113
640.088	44.684
640.237	45.1724
640.387	46.522
640.536	48.369
640.686	47.2591
640.835	46.5552
640.985	48.2585
641.134	50.2769
641.284	50.7933
641.433	48.625
641.582	46.6819
641.732	44.9454
641.881	42.5725
642.031	41.8359
642.18	42.5539
642.33	43.5446
642.479	43.8995
642.629	42.5265
642.778	42.4268
642.928	42.1448
643.077	43.2269
643.227	46.5812
643.376	48.5724
643.526	54.745
643.675	58.4634
643.825	55.8182
643.974	55.9003
644.124	57.9824
644.273	58.9735
644.423	58.9647
644.573	59.5922
644.722	59.7652
644.872	58.4836
645.021	56.6566
645.171	52.2842
645.32	49.9117
645.47	50.6297
645.619	51.8027
645.769	52.1571
645.918	52.1482
646.068	53.7758
646.217	55.2215
646.367	56.5763
646.516	56.8402
646.666	57.7404
646.816	57.6407
646.965	57.5409
647.115	58.5321
647.264	58.3415
647.414	58.6963
647.563	59.2329
647.713	60.4059
647.862	62.2152
648.012	61.7518
648.161	62.2885
648.311	63.7342
648.461	64.4526
648.61	63.9892
648.76	64.799
648.909	65.7902
649.059	66.9636
649.208	70.1366
649.358	70.6732
649.508	68.3917
649.657	69.6556
649.807	71.0108
649.956	71.3656
650.106	73.7208
650.255	76.712
650.405	78.5214
650.555	78.8766
650.704	77.595
650.854	76.1321
651.003	76.0323
651.153	76.7512
651.303	78.2883
651.452	78.6431
651.602	79.9074
651.751	81.0804
651.901	81.3447
652.051	81.7
652.2	83.1457
652.35	87.3191
652.499	91.0376
652.649	93.8473
652.799	98.1117
652.948	99.4665
653.098	101.004
653.247	102.995
653.397	102.986
653.547	103.069
653.696	103.969
653.846	102.961
653.995	100.407
654.145	97.853
654.295	95.7537
654.444	94.6539
654.594	92.9183
654.744	92.1826
654.893	91.356
655.043	89.6204
655.192	87.3389
655.342	84.2291
655.492	82.6547
655.641	81.3425
655.791	79.4751
655.941	76.1431
656.09	72.1646
656.24	70.4487
656.389	68.4499
656.539	66.8047
656.689	66.8767
656.838	68.5752
656.988	73.3647
657.138	78.3359
657.287	82.0348
657.437	85.2788
657.587	88.7046
657.736	91.7672
657.886	92.9203
658.036	94.3461
658.185	95.4995
658.335	96.1981
658.485	95.8057
658.634	93.8683
658.784	93.0213
658.934	92.7199
659.083	93.0551
659.233	94.1173
659.383	95.8159
659.532	98.6057
659.682	99.9406
659.832	100.821
659.981	102.702
660.131	107.037
660.281	109.281
660.43	109.889
660.58	112.042
660.73	112.649
660.879	112.439
661.029	113.047
661.179	113.745
661.328	113.262
661.478	112.415
661.628	111.659
661.777	110.54
661.927	110.148
662.077	108.392
662.226	105.909
662.376	105.699
662.526	104.943
662.675	102.005
662.825	99.4314
662.975	99.8572
663.125	101.556
663.274	103.346
663.424	104.317
663.574	103.834
663.723	103.26
663.873	101.505
664.023	97.7489
664.172	95.9932
664.322	93.4194
664.472	91.2998
664.622	91.635
664.771	90.7885
664.921	87.3056
665.071	84.6409
665.22	83.6125
665.37	82.4932
665.52	82.919
665.67	84.2543
665.819	85.3168
665.969	87.3794
666.119	90.0783
666.268	90.6863
666.418	91.2943
666.568	93.3565
666.718	93.7827
666.867	93.9361
667.017	95.4532
667.167	96.9703
667.316	98.2147
667.466	99.5499
667.616	101.612
667.766	102.311
667.915	101.919
668.065	103.255
668.215	105.318
668.365	107.38
668.514	110.806
668.664	112.96
668.814	112.295
668.964	113.721
669.113	114.966
669.263	114.664
669.413	114.636
669.562	115.517
669.712	116.125
669.862	114.915
670.012	113.614
670.161	112.767
670.311	113.284
670.461	115.983
670.611	117.5
670.76	118.29
670.91	119.807
671.06	120.052
671.21	119.66
671.359	117.904
671.509	117.422
671.659	117.757
671.809	118.093
671.958	119.701
672.108	119.672
672.258	118.008
672.408	117.617
672.558	118.134
672.707	118.651
672.857	119.168
673.007	119.322
673.157	118.475
673.306	116.72
673.456	113.964
673.606	109.754
673.756	104.999
673.905	99.0616
674.055	89.8514
674.205	80.8234
674.355	76.9773
674.505	75.5853
674.654	75.466
674.804	77.3471
674.954	78.8645
675.104	79.1093
675.253	80.1718
675.403	84.4162
675.553	91.2064
675.703	100.724
675.853	109.241
676.002	113.395
676.152	115.367
676.302	115.702
676.452	115.764
676.602	115.439
676.751	113.545
676.901	111.537
677.051	109.596
677.201	108.358
677.35	105.825
677.5	104.54
677.65	104.869
677.8	104.447
677.95	104.092
678.099	103.442
678.249	104.973
678.399	107.96
678.549	110.673
678.699	112.75
678.848	113.827
678.998	116.086
679.148	116.708
679.298	114.695
679.448	113.954
679.597	114.758
679.747	114.108
679.897	111.366
680.047	110.444
680.197	109.703
680.346	108.143
680.496	105.766
680.646	99.57
680.796	95.6471
680.946	97.0878
681.095	97.6195
681.245	97.6056
681.395	99.5918
681.545	101.578
681.695	102.564
681.845	104.732
681.994	106.991
682.144	110.068
682.294	117.145
682.444	122.768
682.594	123.754
682.743	124.468
682.893	124.272
683.043	123.804
683.193	124.79
683.343	125.594
683.493	125.399
683.642	125.385
683.792	125.098
683.942	125.357
684.092	126.253
684.242	126.602
684.392	127.134
684.541	127.575
684.691	127.743
684.841	127.456
684.991	126.988
685.141	126.247
685.29	124.779
685.44	123.674
685.59	122.297
685.74	120.556
685.89	120.269
686.04	120.982
686.19	122.787
686.339	122.501
686.489	121.123
686.639	120.291
686.789	120.005
686.939	119.809
687.089	119.068
687.238	117.691
687.388	116.586
687.538	114.572
687.688	109.195
687.838	104.09
687.988	100.44
688.137	97.6082
688.287	96.4126
688.437	93.3988
688.587	89.5668
688.737	86.553
688.887	83.9937
689.036	80.8892
689.186	78.8756
689.336	79.5891
689.486	79.1207
689.636	79.9251
689.786	81.8204
689.936	80.7159
690.085	81.4295
690.235	84.5066
690.385	86.9474
690.535	88.3881
690.685	88.9198
690.835	89.8151
690.984	91.0742
691.134	91.8788
691.284	90.4106
691.434	88.5786
691.584	88.8376
691.734	87.6419
691.884	85.0829
692.034	83.4329
692.183	82.1466
692.333	82.133
692.483	81.6647
692.633	79.9236
692.783	79.0916
692.933	79.3505
693.083	80.0642
693.232	79.4142
693.382	78.1279
693.532	78.3868
693.682	77.373
693.832	77.3592
693.982	76.9818
694.132	74.2409
694.281	73.5001
694.431	73.3046
694.581	74.109
694.731	74.3679
694.881	73.3541
695.031	76.0676
695.181	77.054
695.33	76.404
695.48	75.4814
695.63	73.6496
695.78	73.454
695.93	72.2583
696.08	72.1536
696.23	72.2309
696.38	71.581
696.529	71.8401
696.679	69.7356
696.829	68.6309
696.979	68.3444
697.129	66.1487
697.279	64.6804
697.429	65.0304
697.578	65.2895
697.728	63.8214
697.878	61.9896
698.028	59.1576
698.178	57.4166
698.328	57.2209
698.478	55.6619
698.628	55.6483
698.777	57.9074
698.927	60.6211
699.077	61.5166
699.227	61.1394
699.377	61.8528
699.527	62.3845
699.677	64.0072
699.827	65.9027
699.977	66.4346
700.126	66.6937
700.276	67.7711
700.426	68.3029
700.576	66.8346
700.726	65.3662
700.876	64.6251
701.026	62.6115
701.176	61.7798
701.325	60.948
701.475	57.8435
701.625	56.6481
701.775	57.3615
701.925	56.3477
702.075	55.6067
702.225	57.1625
702.375	58.0225
702.524	59.1865
702.674	61.2001
702.824	61.4268
702.974	61.6849
703.124	63.4284
703.274	63.5669
703.424	63.0098
703.574	63.5748
703.724	64.8076
703.873	65.775
704.023	67.2879
704.173	68.9826
704.323	71.5859
704.473	76.3711
704.623	74.8564
704.773	73.8205
704.923	72.4146
705.072	72.3168
705.222	70.7765
705.372	67.4712
705.522	63.5295
705.672	59.4965
705.822	56.5544
705.972	52.5218
706.122	46.2165
706.272	47.12
706.421	46.6363
706.571	46.4315
706.721	47.1005
706.871	49.5756
707.021	52.2698
707.171	55.055
707.321	56.6588
707.471	56.0807
707.621	55.4118
707.77	55.1064
707.92	55.0739
708.07	56.314
708.22	55.7355
708.37	53.4298
708.52	51.124
708.67	48.4551
708.82	46.5134
708.969	46.6626
709.119	47.8118
709.269	48.5065
709.419	48.9284
709.569	48.7136
709.719	48.7715
709.869	51.1935
710.019	52.8881
710.169	52.0374
710.318	51.4593
710.468	51.7903
710.618	50.9396
710.768	49.1797
710.918	48.3285
711.068	48.2955
711.218	48.2629
711.368	48.5939
711.518	48.3795
711.667	48.3469
711.817	50.4962
711.967	53.1908
712.117	54.6128
712.267	56.0343
712.417	58.7286
712.567	59.2414
712.717	57.6634
712.867	57.8126
713.016	58.5982
713.166	58.3838
713.316	58.3512
713.466	58.5913
713.616	57.831
713.766	57.2525
713.916	57.4018
714.066	57.4601
714.216	58.9729
714.365	62.1222
714.515	63.4532
714.665	63.2388
714.815	64.4789
714.965	65.1732
715.115	65.1402
715.265	65.9257
715.415	66.8932
715.565	68.4969
715.714	71.828
715.864	75.159
716.014	77.0355
716.164	78.8211
716.314	81.9699
716.464	85.4823
716.614	89.2679
716.764	92.2353
716.914	95.2027
717.063	99.0792
717.213	101.047
717.363	99.1049
717.513	97.7996
717.663	97.312
717.813	95.4608
717.963	93.701
718.113	90.6684
718.263	87.9994
718.412	86.0577
718.562	84.5706
718.712	81.3562
718.862	78.1418
719.012	76.2906
719.162	74.0757
719.312	72.7704
719.462	72.1015
719.612	71.4325
719.761	71.8545
719.911	73.731
720.061	76.062
720.211	76.9381
720.361	77.7232
720.511	79.5084
720.661	82.294
720.811	84.625
720.96	85.047
721.11	86.7417
721.26	88.4363
721.41	87.9492
721.56	87.2798
721.71	88.6104
721.86	89.9415
722.01	89.0907
722.16	87.6945
722.309	86.1164
722.459	85.6293
722.609	87.6876
722.759	89.8364
722.909	89.3488
723.059	89.2249
723.209	88.9196
723.359	87.3415
723.508	86.2107
723.658	85.7083
723.808	86.6525
723.958	88.4975
724.108	89.0618
724.258	88.6182
724.408	87.3489
724.558	87.0716
724.707	87.241
724.857	87.5843
725.007	88.0105
725.157	89.0721
725.307	92.7701
725.457	96.0135
725.607	97.0755
725.757	99.4102
725.906	101.472
726.056	102.171
726.206	103.778
726.356	106.385
726.506	108.538
726.656	109.872
726.806	110.752
726.956	111.723
727.105	111.694
727.255	112.393
727.405	112.545
727.555	111.516
727.705	111.305
727.855	111.275
728.005	111.61
728.154	111.218
728.304	111.007
728.454	111.523
728.604	111.221
728.754	111.556
728.904	112.345
729.054	111.952
729.204	112.741
729.353	115.076
729.503	116.865
729.653	118.927
729.803	121.079
729.953	122.414
730.103	123.112
730.253	123.174
730.402	124.054
730.552	123.48
730.702	123.905
730.852	124.694
731.002	124.573
731.152	125.271
731.302	124.697
731.451	123.941
731.601	123.457
731.751	122.701
731.901	121.853
732.051	120.097
732.201	121.068
732.351	123.13
732.5	123.737
732.65	124.344
732.8	124.588
732.95	125.104
733.1	126.347
733.25	126.955
733.4	126.835
733.549	128.169
733.699	129.777
733.849	129.748
733.999	128.627
734.149	129.143
734.299	130.478
734.449	131.54
734.598	132.147
734.748	132.3
734.898	134.089
735.048	136.241
735.198	137.121
735.348	138.092
735.497	139.79
735.647	142.215
735.797	143.731
735.947	144.157
736.097	143.764
736.247	143.371
736.396	142.615
736.546	141.131
736.696	139.102
736.846	137.891
736.996	137.771
737.146	136.65
737.296	136.621
737.445	137.865
737.595	140.018
737.745	142.534
737.895	144.959
738.045	147.93
738.195	149.173
738.344	151.326
738.494	154.206
738.644	157.177
738.794	159.875
738.944	159.118
739.094	157.453
739.243	155.969
739.393	155.303
739.543	155.637
739.693	154.335
739.843	154.488
739.992	157.004
740.142	158.793
740.292	157.4
740.442	157.007
740.592	158.796
740.742	160.585
740.891	161.92
741.041	161.89
741.191	159.497
741.341	157.377
741.491	157.621
741.641	155.773
741.79	154.108
741.94	154.442
742.09	153.867
742.24	153.565
742.39	154.172
742.539	154.233
742.689	155.113
742.839	158.357
742.989	162.418
743.139	163.48
743.288	164.723
743.438	165.603
743.588	165.392
743.738	165.363
743.888	165.424
744.038	165.577
744.187	165.82
744.337	166.245
744.487	166.034
744.637	166.55
744.786	167.248
744.936	168.673
745.086	169.189
745.236	169.705
745.386	171.403
745.536	171.919
745.685	171.981
745.835	172.042
745.985	172.013
746.135	171.984
746.284	170.681
746.434	169.718
746.584	168.343
746.734	168.766
746.884	169.462
747.033	169.498
747.183	170.525
747.333	170.669
747.483	169.701
747.633	168.067
747.782	166.779
747.932	165.569
748.082	165.552
748.232	164.724
748.382	161.91
748.531	160.846
748.681	159.608
748.831	156.267
748.981	153.908
749.13	153.049
749.28	152.006
749.43	151.045
749.58	150.739
749.729	150.32
749.879	149.846
750.029	149.509
750.179	149.111
750.329	147.825
750.478	148.874
750.628	149.897
750.778	150.259
750.928	151.924
751.077	152.259
751.227	152.677
751.377	152.598
751.527	154.208
751.676	156.727
751.826	157.159
751.976	157.928
752.126	156.783
752.276	155.563
752.425	155.2
752.575	153.464
752.725	152.45
752.875	150.946
753.024	148.661
753.174	145.996
753.324	142.905
753.474	140.68
753.623	139.014
753.773	137.998
753.923	135.778
754.073	133.746
754.222	133.419
754.372	133.65
754.522	133.992
754.672	133.715
754.821	133.142
754.971	132.805
755.121	131.977
755.27	130.733
755.42	129.28
755.57	128.502
755.72	127.829
755.869	126.149
756.019	124.053
756.169	121.853
756.319	120.917
756.468	120.2
756.618	120.089
756.768	120.475
756.917	119.912
757.067	120.277
757.217	120.864
757.367	120.167
757.516	119.64
757.666	119.249
757.816	119.541
757.966	119.431
758.115	118.813
758.265	117.146
758.415	115.138
758.564	114.458
758.714	113.931
758.864	113.426
759.014	113.082
759.163	112.977
759.313	112.957
759.463	111.924
759.612	109.751
759.762	107.441
759.912	106.049
760.061	104.852
760.211	104.338
760.361	102.617
760.511	99.9972
760.66	97.9647
760.81	95.9184
760.96	92.9084
761.109	90.01
761.259	90.7057
761.409	90.9772
761.558	90.5964
761.708	90.3425
761.858	87.9029
762.008	85.9316
762.157	87.5985
762.166	89.2867
762.316	88.347
762.465	88.0968
762.615	88.0037
762.765	86.6172
762.914	86.6198
763.064	86.5825
763.214	87.2725
763.363	89.2356
763.513	90.6532
763.663	89.6159
763.812	88.3062
763.962	90.2693
764.112	93.5047
764.262	95.4678
764.411	95.8854
764.561	95.4845
764.711	96.6293
764.86	98.2288
765.01	100.01
765.16	101.245
765.309	101.209
765.459	101.626
765.609	100.771
765.759	98.461
765.908	97.424
766.058	98.0235
766.208	99.1684
766.357	99.1314
766.507	97.0945
766.657	96.6026
766.807	98.0202
766.956	98.4378
767.106	98.0373
767.256	98.0003
767.405	98.1452
767.555	98.1083
767.705	97.9805
767.855	97.7617
768.004	96.9975
768.154	98.3242
768.304	99.2876
768.454	98.978
768.603	100.577
768.753	101.359
768.903	102.504
769.053	104.921
769.202	106.885
769.352	107.393
769.502	107.811
769.652	109.683
769.801	109.283
769.951	106.064
770.101	103.482
770.251	103.081
770.4	104.317
770.55	103.553
770.7	102.516
770.85	102.298
770.999	104.442
771.149	107.042
771.299	106.733
771.449	107.787
771.598	110.659
771.748	113.44
771.898	115.312
772.048	117.801
772.197	120.628
772.347	122.52
772.497	124.479
772.647	123.866
772.797	122.319
772.946	122.928
773.096	123.33
773.246	125.162
773.396	125.513
773.545	123.475
773.695	120.705
773.845	118.026
773.995	115.528
774.145	112.94
774.294	110.988
774.444	108.581
774.594	106.72
774.744	105.768
774.893	102.816
775.043	100.591
775.193	100.094
775.343	99.2328
775.493	98.2808
775.642	96.8741
775.792	95.5585
775.942	94.152
776.092	93.6546
776.242	93.5208
776.391	92.2053
776.541	92.2533
776.691	92.9377
776.841	92.1676
776.991	93.0338
777.141	94.7182
777.29	96.4935
777.44	97.4506
777.59	98.226
777.74	98.274
777.89	97.5039
778.039	97.3701
778.189	96.3273
778.339	96.0117
778.489	96.6961
778.639	94.3805
778.789	92.5194
778.938	91.6584
779.088	90.5246
779.238	90.6636
779.388	91.1662
779.538	91.0324
779.687	90.2622
779.837	88.8558
779.987	86.9038
780.137	85.4064
780.287	85.6363
780.437	84.5934
780.586	83.0962
780.736	82.5079
780.886	80.465
781.036	79.9676
781.186	80.8338
781.336	82.0637
781.485	87.1119
781.635	91.0692
781.785	89.9355
781.935	88.2562
782.085	87.0316
782.235	86.0796
782.385	86.2188
782.534	85.9943
782.684	84.1334
782.834	80.9996
782.984	77.5931
783.134	71.823
783.284	67.2347
783.434	65.9193
783.583	64.2403
783.733	64.4703
783.883	64.9729
784.033	64.6573
784.183	65.6145
784.333	66.6625
784.483	67.7107
784.632	68.759
784.782	67.2618
784.932	65.7645
785.082	65.9035
785.232	66.9515
785.382	67.0905
785.532	66.2297
785.682	66.4597
785.831	65.7807
785.981	64.0107
786.131	62.6951
786.281	60.3796
786.431	58.9731
786.581	58.6575
786.731	58.3421
786.88	58.2994
787.03	59.2567
787.18	60.6686
787.33	59.8077
787.48	58.674
787.63	58.9948
787.78	58.4975
787.93	60.273
788.08	63.0486
788.229	63.915
788.379	64.4178
788.529	63.1933
788.679	61.0597
788.829	60.2896
788.979	59.974
789.129	59.3859
789.279	59.1614
789.429	59.6641
[truncated: 1,071 more rows]
