# Supplementary material for: Down/up conversion luminescence of erbium-ytterbium co-deposited nanoparticles on carbon nanotubes via a microwave-assisted method
Source: PeerJ journal article supplement (doi:10.7717/peerj-matsci.33), 2025-03-07
Supplement: Figure7.zip [file Figure7.zip]

## Sheet: Hoja1
450.083	-7249.18
450.188	-7160.25
450.294	-7073.45
450.4	-6988.81
450.505	-6906.31
450.611	-6825.95
450.717	-6747.75
450.822	-6671.68
450.928	-6597.76
451.034	-6525.99
451.139	-6456.36
451.245	-6388.88
451.351	-6323.54
451.456	-6260.35
451.562	-6199.3
451.667	-6140.4
451.773	-6083.64
451.879	-6029.03
451.984	-5976.56
452.09	-5926.24
452.196	-5878.07
452.301	-5844.91
452.407	-5814.12
452.513	-5785.13
452.618	-5757.22
452.724	-5729.29
452.829	-5701.49
452.935	-5673.38
453.041	-5644.93
453.146	-5614.96
453.252	-5582.4
453.358	-5547.21
453.463	-5509.39
453.569	-5470.1
453.674	-5429.56
453.78	-5387.96
453.886	-5344.82
453.991	-5300.78
454.097	-5256.17
454.203	-5212
454.308	-5168.6
454.414	-5125.4
454.519	-5081.89
454.625	-5038.26
454.731	-4994.91
454.836	-4951.8
454.942	-4909.66
455.047	-4868.41
455.153	-4827.78
455.259	-4787.21
455.364	-4746.49
455.47	-4705.98
455.575	-4666.47
455.681	-4628
455.786	-4589.92
455.892	-4551.81
455.998	-4513.56
456.103	-4475.64
456.209	-4438.02
456.314	-4402.09
456.42	-4367.27
456.526	-4332.12
456.631	-4296.58
456.737	-4260.82
456.842	-4224.71
456.948	-4187.7
457.053	-4150.2
457.159	-4111.84
457.265	-4072.83
457.37	-4033.01
457.476	-3992.37
457.581	-3951.87
457.687	-3911.43
457.792	-3870.74
457.898	-3829.22
458.003	-3787.21
458.109	-3745.51
458.215	-3704.97
458.32	-3665.87
458.426	-3629.26
458.531	-3593.25
458.637	-3557.8
458.742	-3523.09
458.848	-3488.98
458.953	-3454.82
459.059	-3420.6
459.165	-3386.11
459.27	-3351.81
459.376	-3316.99
459.481	-3281.49
459.587	-3245.04
459.692	-3207.89
459.798	-3169.97
459.903	-3131.46
460.009	-3092.7
460.114	-3054.56
460.22	-3018.2
460.325	-2983.66
460.431	-2950.69
460.536	-2919.1
460.642	-2887.62
460.747	-2856.78
460.853	-2826.04
460.958	-2794.5
461.064	-2761.9
461.17	-2728.04
461.275	-2693.38
461.381	-2658.15
461.486	-2621.87
461.592	-2584.19
461.697	-2544.71
461.803	-2503.69
461.908	-2461.99
462.014	-2420.15
462.119	-2378.12
462.225	-2336.67
462.33	-2296.3
462.436	-2255.62
462.541	-2214.45
462.647	-2172.13
462.752	-2127.98
462.858	-2082.66
462.963	-2035.02
463.069	-1984.86
463.174	-1933.32
463.279	-1880.55
463.385	-1828.04
463.49	-1775.63
463.596	-1722.89
463.701	-1669.82
463.807	-1617.09
463.912	-1565.73
464.018	-1516.5
464.123	-1469.82
464.229	-1425.55
464.334	-1383.71
464.44	-1343.75
464.545	-1304.65
464.651	-1266.5
464.756	-1228.94
464.862	-1192.05
464.967	-1156.03
465.072	-1120.1
465.178	-1084.94
465.283	-1051.65
465.389	-1019.89
465.494	-989.857
465.6	-960.546
465.705	-931.023
465.811	-901.887
465.916	-873.144
466.022	-844.727
466.127	-817.453
466.232	-790.673
466.338	-763.68
466.443	-736.399
466.549	-708.97
466.654	-680.624
466.76	-651.64
466.865	-622.463
466.97	-593.466
467.076	-564.58
467.181	-535.408
467.287	-505.735
467.392	-475.853
467.498	-444.512
467.603	-411.618
467.708	-376.377
467.814	-339.148
467.919	-301.035
468.025	-262.418
468.13	-223.914
468.235	-186.49
468.341	-149.437
468.446	-113.481
468.552	-78.994
468.657	-46.6778
468.762	-16.4902
468.868	10.6157
468.973	34.329
469.079	54.7443
469.184	71.5901
469.289	84.2497
469.395	93.4981
469.5	99.01
469.606	101.486
469.711	100.955
469.816	96.7361
469.922	88.7094
470.027	76.7396
470.133	63.8307
470.238	50.1655
470.343	35.8265
470.449	21.4389
470.554	7.46437
470.659	-5.48971
470.765	-17.0424
470.87	-25.6758
470.976	-31.2293
471.081	-33.3193
471.186	-31.2214
471.292	-24.48
471.397	-12.9963
471.502	4.49822
471.608	26.5044
471.713	53.0203
471.818	82.9086
471.924	114.316
472.029	147.723
472.134	182.447
472.24	218.378
472.345	254.598
472.451	289.819
472.556	323.892
472.661	356.494
472.767	387.473
472.872	416.179
472.977	442.466
473.083	464.844
473.188	483.56
473.293	498.993
473.399	509.919
473.504	515.954
473.609	517.531
473.715	513.915
473.82	505.668
473.925	492.856
474.031	475.703
474.136	456.862
474.241	437.146
474.346	417.368
474.452	396.761
474.557	375.592
474.662	354.688
474.768	334.875
474.873	317.334
474.978	301.086
475.084	286.071
475.189	271.63
475.294	256.724
475.4	241.423
475.505	225.559
475.61	209.739
475.715	194.416
475.821	178.808
475.926	163.946
476.031	149.985
476.137	136.995
476.242	125.82
476.347	116.025
476.452	107.044
476.558	99.1603
476.663	92.4749
476.768	87.1429
476.874	83.5496
476.979	81.2334
477.084	79.1482
477.189	77.4878
477.295	75.991
477.4	75.1742
477.505	75.2213
477.61	75.5278
477.716	76.6155
477.821	78.5124
477.926	81.5993
478.031	86.1048
478.137	91.1805
478.242	96.6348
478.347	102.779
478.452	108.899
478.558	114.938
478.663	121.242
478.768	127.101
478.873	131.708
478.979	135.605
479.084	138.669
479.189	140.309
479.294	140.415
479.4	138.866
479.505	135.362
479.61	131.087
479.715	126.536
479.821	122.227
479.926	117.166
480.031	111.769
480.136	106.627
480.241	101.007
480.347	95.454
480.452	90.3669
480.557	85.3383
480.662	80.1069
480.768	74.6413
480.873	69.043
480.978	62.6615
481.083	56.7336
481.188	50.1746
481.294	43.114
481.399	36.3464
481.504	30.4196
481.609	25.2961
481.714	21.3115
481.82	18.3221
481.925	16.0105
482.03	13.868
482.135	12.4845
482.24	11.7171
482.345	11.0469
482.451	10.9972
482.556	11.5146
482.661	11.9392
482.766	12.3981
482.871	14.0279
482.977	16.2888
483.082	18.5256
483.187	22.1156
483.292	25.7019
483.397	30.1204
483.502	34.6886
483.608	40.3359
483.713	46.8263
483.818	53.6323
483.923	60.9282
484.028	68.0187
484.133	74.0563
484.238	79.3675
484.344	83.9481
484.449	87.9554
484.554	91.6933
484.659	93.8881
484.764	94.2192
484.869	93.3728
484.975	90.9641
485.08	86.9305
485.185	80.6501
485.29	73.1088
485.395	63.4376
485.5	53.834
485.605	44.6313
485.71	36.435
485.816	28.6714
485.921	20.9847
486.026	13.666
486.131	6.2837
486.236	-1.39785
486.341	-8.50341
486.446	-15.1142
486.551	-20.8519
486.657	-25.9575
486.762	-31.1794
486.867	-36.6074
486.972	-41.593
487.077	-46.2107
487.182	-50.8859
487.287	-55.7702
487.392	-59.1868
487.497	-61.1845
487.602	-60.253
487.708	-57.4605
487.813	-53.6079
487.918	-49.3083
488.023	-45.4605
488.128	-41.6099
488.233	-38.1976
488.338	-35.8083
488.443	-34.1834
488.548	-33.1886
488.653	-31.9468
488.758	-31.7266
488.863	-32.73
488.969	-35.2326
489.074	-38.4465
489.179	-43.1399
489.284	-49.0318
489.389	-55.3705
489.494	-60.742
489.599	-65.2505
489.704	-68.4349
489.809	-71.2007
489.914	-73.4844
490.019	-75.1734
490.124	-76.7756
490.229	-77.6298
490.334	-78.1541
490.439	-78.349
490.544	-77.6617
490.649	-76.0548
490.754	-73.3266
490.859	-71.0378
490.964	-69.2239
491.07	-67.6175
491.175	-66.3812
491.28	-65.9887
491.385	-66.1081
491.49	-66.1479
491.595	-64.9455
491.7	-62.9127
491.805	-60.0051
491.91	-56.9449
492.015	-53.9837
492.12	-50.0756
492.225	-45.5548
492.33	-39.7071
492.435	-32.752
492.54	-25.2828
492.645	-17.3259
492.75	-9.00508
492.855	-0.9056
492.96	5.6869
493.065	10.2615
493.17	12.374
493.275	12.403
493.38	10.7564
493.485	7.64482
493.59	4.1246
493.695	0.60365
493.8	-3.49022
493.905	-7.69388
494.01	-11.5347
494.115	-14.4048
494.22	-15.374
494.325	-15.0661
494.43	-13.1931
494.535	-10.1827
494.64	-6.60405
494.745	-2.8707
494.849	0.44421
494.954	3.00815
495.059	4.20647
495.164	3.70925
495.269	2.37661
495.374	0.85138
495.479	-0.32614
495.584	-1.19898
495.689	-1.18834
495.794	-0.88151
495.899	-1.18347
496.004	-1.70243
496.109	-2.51592
496.214	-3.36453
496.319	-4.10623
496.424	-4.62552
496.529	-4.91248
496.634	-5.64408
496.739	-7.0687
496.843	-9.60793
496.948	-13.5128
497.053	-18.861
497.158	-25.5208
497.263	-33.3839
497.368	-40.864
497.473	-47.8087
497.578	-54.0137
497.683	-60.1243
497.788	-65.4443
497.893	-70.998
497.998	-76.3964
498.102	-80.8848
498.207	-84.1035
498.312	-86.1413
498.417	-86.5932
498.522	-85.3819
498.627	-82.8966
498.732	-79.478
498.837	-75.1885
498.942	-70.2088
499.047	-64.6801
499.151	-58.0702
499.256	-50.6023
499.361	-42.8844
499.466	-33.8967
499.571	-24.95
499.676	-16.7091
499.781	-9.53758
499.886	-3.06022
499.99	1.68378
500.095	4.72922
500.2	7.00976
500.305	8.26288
500.41	8.77688
500.515	9.42408
500.62	11.2506
500.724	13.8942
500.829	17.3205
500.934	21.8818
501.039	27.7739
501.144	35.0665
501.249	43.37
501.354	52.2798
501.458	61.7154
501.563	72.1324
501.668	82.4343
501.773	91.9792
501.878	101.406
501.983	110.953
502.087	120.169
502.192	129.329
502.297	138.827
502.402	148.221
502.507	157.61
502.611	167.746
502.716	178.411
502.821	188.408
502.926	198.076
503.031	207.433
503.136	215.863
503.24	223.195
503.345	228.903
503.45	233.368
503.555	236.463
503.66	239.185
503.764	241.128
503.869	242.037
503.888	243.131
503.993	244.024
504.098	243.905
504.203	243.53
504.308	243.325
504.414	243.427
504.519	243.942
504.624	245.667
504.729	248.142
504.834	251.448
504.94	255.804
505.045	260.835
505.15	266.163
505.255	271.534
505.36	276.788
505.466	282.285
505.571	287.854
505.676	293.583
505.781	298.853
505.886	303.694
505.992	309.092
506.097	314.378
506.202	318.843
506.307	322.701
506.412	326.523
506.517	330.157
506.623	334.346
506.728	339.421
506.833	344.986
506.938	350.88
507.043	357.013
507.148	363.051
507.254	369.038
507.359	375.586
507.464	382.634
507.569	389.858
507.674	397.476
507.779	405.936
507.885	415.073
507.99	424.801
508.095	435.666
508.2	445.904
508.305	455.232
508.41	463.975
508.516	472.781
508.621	481.251
508.726	489.512
508.831	497.878
508.936	505.715
509.041	512.813
509.146	518.797
509.252	524.067
509.357	528.357
509.462	532.063
509.567	534.452
509.672	535.392
509.777	535.719
509.882	535.603
509.987	535.636
510.093	536.409
510.198	538.35
510.303	540.692
510.408	543.946
510.513	548.137
510.618	553.995
510.723	561.615
510.828	570.864
510.934	581.021
511.039	591.572
511.144	602.639
511.249	614.225
511.354	626.068
511.459	637.723
511.564	649.089
511.669	659.614
511.774	668.723
511.879	677.78
511.985	686.434
512.09	694.742
512.195	702.601
512.3	709.543
512.405	715.265
512.51	719.987
512.615	723.686
512.72	727.023
512.825	729.495
512.93	730.449
513.035	730.048
513.141	729.256
513.246	727.969
513.351	727.049
513.456	726.115
513.561	724.838
513.666	722.845
513.771	720.662
513.876	718.28
513.981	716.905
514.086	715.89
514.191	716.155
514.296	717.513
514.401	719.136
514.506	721.263
514.611	723.647
514.716	726.593
514.822	730.266
514.927	734.269
515.032	738.513
515.137	743.34
515.242	748.789
515.347	754.183
515.452	759.74
515.557	764.713
515.662	768.537
515.767	771.742
515.872	775.519
515.977	778.702
516.082	782.575
516.187	786.814
516.292	791.113
516.397	794.626
516.502	797.091
516.607	799.29
516.712	800.285
516.817	801.104
516.922	801.554
517.027	801.231
517.132	800.601
517.237	800.604
517.342	800.988
517.447	800.734
517.552	800.106
517.657	798.753
517.762	797.095
517.867	795.421
517.972	794.55
518.077	792.926
518.182	791.504
518.287	789.135
518.392	786.003
518.497	781.807
518.602	776.848
518.707	771.564
518.812	765.277
518.917	759.335
519.022	752.788
519.127	745.905
519.232	739.526
519.337	734.617
519.442	730.307
519.547	726.71
519.652	724.626
519.757	723.418
519.862	723.481
519.967	725.843
520.072	730.564
520.177	735.896
520.282	742.563
520.387	749.801
520.492	758.238
520.597	768.226
520.702	780.425
520.807	794.586
520.912	810.014
521.017	828.15
521.122	848.051
521.226	870.359
521.331	896.062
521.436	925.021
521.541	955.371
521.646	987.297
521.751	1020.39
521.856	1054.03
521.961	1088.37
522.066	1123.22
522.171	1157.14
522.276	1188.91
522.381	1219.49
522.486	1248.05
522.591	1275.14
522.696	1300.09
522.8	1322.57
522.905	1342.48
523.01	1359.91
523.115	1376.17
523.22	1390.84
523.325	1404.88
523.43	1419.04
523.535	1432.71
523.64	1444.74
523.745	1457.3
523.85	1470.09
523.954	1483.21
524.059	1497.17
524.164	1512.16
524.269	1528.36
524.374	1545.8
524.479	1565.93
524.584	1588.27
524.689	1612.66
524.794	1637.83
524.898	1664.26
525.003	1692.27
525.108	1721.89
525.213	1753.23
525.318	1785.33
525.423	1818.6
525.528	1852.47
525.633	1885.4
525.738	1915.34
525.842	1943.94
525.947	1969.6
526.052	1992.31
526.157	2012.81
526.262	2030.13
526.367	2043.73
526.472	2053.39
526.576	2059.57
526.681	2060.86
526.786	2057.75
526.891	2050.22
526.996	2039.33
527.101	2026.21
527.206	2011.15
527.31	1995.38
527.415	1978.83
527.52	1962.68
527.625	1946.72
527.73	1930.34
527.835	1914.06
527.939	1899.73
528.044	1886.72
528.149	1875.75
528.254	1867.44
528.359	1860.86
528.464	1856.34
528.568	1853.41
528.673	1852.21
528.778	1851.25
528.883	1851.01
528.988	1851.67
529.092	1853.74
529.197	1857.4
529.302	1862.3
529.407	1868.49
529.512	1875.12
529.616	1882.05
529.721	1888.44
529.826	1893.71
529.931	1897.62
530.036	1901.16
530.14	1903.7
530.245	1905.49
530.35	1906.06
530.455	1905.14
530.56	1903.58
530.664	1900.53
530.769	1896.04
530.874	1889.67
530.979	1882.88
531.083	1876.4
531.188	1869.88
531.293	1863.24
531.398	1856.14
531.503	1848.92
531.607	1841.21
531.712	1833.15
531.817	1824.51
531.922	1814.86
532.026	1805.46
532.131	1797.2
532.236	1789.78
532.341	1782.71
532.445	1775.39
532.55	1768.2
532.655	1761.49
532.76	1754.45
532.864	1747.62
532.969	1740.33
533.074	1733.46
533.179	1726.7
533.283	1719.32
533.388	1711.72
533.493	1703.47
533.598	1694.74
533.702	1685.35
533.807	1675.69
533.912	1666.25
534.016	1656.62
534.121	1648.28
534.226	1641.2
534.331	1634.96
534.435	1628.8
534.54	1622.69
534.645	1617.23
534.75	1611.77
534.854	1604.97
534.959	1597.28
535.064	1588.65
535.168	1579.94
535.273	1570.5
535.378	1559.67
535.482	1547.77
535.587	1535.01
535.692	1522.11
535.797	1509.46
535.901	1497.8
536.006	1487.32
536.111	1477.71
536.215	1470.1
536.32	1464.27
536.425	1459.92
536.529	1456.89
536.634	1454.39
536.739	1453.17
536.843	1452.5
536.948	1452.64
537.053	1453.57
537.157	1454.64
537.262	1455.83
537.367	1455.82
537.471	1453.88
537.576	1450.97
537.681	1447.15
537.785	1443.06
537.89	1438.35
537.995	1433.57
538.099	1427.72
538.204	1421.42
538.308	1414.9
538.413	1407.12
538.518	1397.59
538.622	1386.09
538.727	1372.25
538.832	1357.69
538.936	1341.68
539.041	1324.29
539.146	1305.91
539.25	1286.35
539.355	1266.03
539.459	1244.54
539.564	1222.61
539.669	1201.2
539.773	1180.72
539.878	1162.37
539.983	1145.49
540.087	1130.18
540.192	1115.76
540.296	1103.2
540.401	1091.97
540.506	1081.69
540.61	1072.27
540.715	1063.98
540.819	1055.95
540.924	1048.98
541.029	1042.4
541.133	1036.52
541.238	1030.68
541.342	1024.5
541.447	1017.97
541.552	1011.14
541.656	1003.89
541.761	996.648
541.865	989.528
541.97	982.246
542.074	973.772
542.179	964.459
542.284	953.567
542.388	942.48
542.493	930.561
542.597	918.459
542.702	905.97
542.806	893.309
542.911	880.148
543.015	867.863
543.12	855.172
543.225	845.114
543.329	835.492
543.434	822.165
543.538	805.444
543.643	786.916
543.747	767.693
543.852	748.646
543.956	729.355
544.061	709.829
544.165	690.149
544.27	671.03
544.374	652.932
544.479	637.106
544.583	623.106
544.688	611.348
544.793	601.999
544.897	595.108
545.002	590.118
545.106	586.979
545.211	584.755
545.315	584.297
545.42	580.106
545.524	570.551
545.629	559.053
545.733	546.151
545.838	531.495
545.942	514.891
546.047	496.181
546.151	475.681
546.256	454.577
546.36	433.669
546.465	413.17
546.569	393.58
546.674	374.761
546.778	356.751
546.883	339.351
546.987	322.089
547.091	304.901
547.196	288.119
547.3	271.033
547.405	253.808
547.509	232.063
547.614	206.287
547.718	180.561
547.823	156.15
547.927	133.141
548.032	111.645
548.136	91.6577
548.241	73.8701
548.345	59.1425
548.449	46.9996
548.554	37.8478
548.658	31.5285
548.763	27.415
548.867	24.9755
548.972	23.8914
549.076	23.5827
549.181	23.0752
549.285	21.255
549.389	17.6319
549.494	11.674
549.598	1.44235
549.703	-8.76257
549.807	-16.0289
549.911	-22.3103
550.016	-27.9576
550.12	-33.0385
550.225	-36.891
550.329	-38.781
550.434	-38.7539
550.538	-37.6468
550.642	-35.4778
550.747	-32.5767
550.851	-28.5518
550.956	-23.7269
551.06	-18.5181
551.164	-13.1623
551.269	-8.11872
551.373	-3.16707
551.478	1.8762
551.582	6.34851
551.686	10.3663
551.791	13.8415
551.895	17.46
551.999	21.6739
552.104	26.3389
552.208	31.3876
552.302	36.7142
552.407	41.9588
552.512	47.1607
552.617	51.6584
552.721	55.8074
552.826	59.5833
552.931	62.8432
553.036	65.6049
553.141	67.2302
553.245	67.9899
553.35	67.0538
553.455	65.1659
553.56	62.171
553.665	57.9111
553.769	52.7547
553.874	46.773
553.979	41.1251
554.084	35.4376
554.189	29.1413
554.293	22.3324
554.398	15.1868
554.503	8.19633
554.608	1.57468
554.713	-4.84266
554.817	-10.3368
554.922	-14.5056
555.027	-16.9712
555.132	-18.0568
555.236	-18.5116
555.341	-17.4042
555.446	-15.7584
555.551	-11.9434
555.655	-6.49097
555.76	0.37227
555.865	8.48572
555.97	17.5288
556.074	27.7691
556.179	38.2842
556.284	48.7508
556.389	59.1494
556.494	69.2739
556.598	78.6141
556.703	87.086
556.808	94.5504
556.912	101.218
557.017	107.051
557.122	111.95
557.227	116.005
557.331	118.22
557.436	119.213
557.541	118.658
557.646	117.542
557.75	114.976
557.855	111.106
557.96	106.481
558.065	101.725
558.169	96.7313
558.274	90.7946
558.379	84.5969
558.483	78.1565
558.588	72.352
558.693	67.3158
558.798	63.3695
558.902	60.5368
559.007	58.7742
559.112	57.6493
559.216	56.8829
559.321	55.8818
559.426	54.2387
559.531	52.6024
559.635	50.4796
559.74	48.2309
559.845	45.4711
559.949	42.6374
560.054	39.4824
560.159	36.2644
560.263	32.1461
560.368	27.8342
560.473	23.7631
560.577	19.913
560.682	16.9535
560.787	13.8531
560.891	11.0566
560.996	8.57081
561.101	5.97667
561.206	3.23776
561.31	-0.17508
561.415	-4.22976
561.52	-8.56576
561.624	-13.6834
561.729	-19.4942
561.833	-25.4039
561.938	-31.6848
562.043	-37.8428
562.147	-43.894
562.252	-49.5427
562.357	-55.2931
562.461	-60.2991
562.566	-64.7794
562.671	-69.2267
562.775	-72.5586
562.88	-75.5699
562.985	-77.8483
563.089	-80.1206
563.194	-82.2348
563.299	-84.1586
563.403	-85.4937
563.508	-86.403
563.613	-86.6185
563.717	-86.3525
563.822	-85.0934
563.926	-82.7011
564.031	-78.3752
564.136	-72.7082
564.24	-66.4352
564.345	-59.4196
564.449	-51.7431
564.554	-43.4777
564.659	-35.8672
564.763	-29.2014
564.868	-22.461
564.973	-16.5311
565.077	-11.0018
565.182	-5.60479
565.286	0.20632
565.391	6.28393
565.496	12.2501
565.6	17.97
565.705	23.7867
565.809	28.6495
565.914	33.6302
566.019	38.3823
566.123	43.3212
566.228	47.764
566.332	51.7986
566.437	55.8923
566.542	59.1758
566.646	61.3775
566.751	61.8852
566.855	61.351
566.96	60.6917
567.064	60.1716
567.169	60.0295
567.274	60.4807
567.378	61.5464
567.483	62.0993
567.587	62.0646
567.692	61.7227
567.796	60.8089
567.901	59.355
568.005	58.4023
568.11	57.3339
568.215	56.3484
568.319	54.3234
568.424	51.3554
568.528	47.7961
568.633	42.9191
568.737	36.8315
568.842	30.0688
568.946	23.9268
569.051	19.2213
569.156	15.2962
569.26	11.8322
569.365	9.09765
569.469	6.61385
569.574	3.8992
569.678	1.20136
569.783	-0.89448
569.887	-2.12467
569.992	-2.88609
570.096	-3.2358
570.201	-3.46407
570.305	-3.31649
570.41	-3.44441
570.514	-3.17016
570.619	-3.12636
570.723	-3.55083
570.828	-3.75107
570.932	-3.64443
571.037	-2.85158
571.141	-1.54602
571.246	-0.15577
571.35	0.91509
571.455	2.14611
571.559	2.77796
571.664	3.05977
571.768	2.9446
571.873	3.37848
571.977	3.75195
572.082	4.28604
572.186	5.30956
572.291	7.01135
572.395	9.35492
572.5	12.6017
572.604	16.9533
572.709	22.2263
572.813	28.1878
572.918	34.8627
573.022	42.0653
573.127	49.7016
573.231	57.6145
573.335	65.2935
573.44	72.0144
573.544	78.153
573.649	83.442
573.753	88.0806
573.858	91.0467
573.962	92.5967
574.067	92.1015
574.171	89.8865
574.276	85.5192
574.38	78.9701
574.484	70.3463
574.589	60.8471
574.693	50.0829
574.798	38.1318
574.902	24.8301
575.007	10.2779
575.111	-5.8686
575.215	-23.2644
575.32	-41.1919
575.424	-58.9219
575.529	-76.1046
575.633	-92.2302
575.738	-107.543
575.842	-121.83
575.946	-135.765
576.051	-148.39
576.155	-159.543
576.26	-169.148
576.364	-176.983
576.468	-182.778
576.573	-186.655
576.677	-187.925
576.782	-187.543
576.886	-185.38
576.99	-181.513
577.095	-176.426
577.199	-170.471
577.304	-163.464
577.408	-155.146
577.512	-145.859
577.617	-135.556
577.721	-124.217
577.826	-112.533
577.93	-100.603
578.034	-89.1942
578.139	-77.6157
578.243	-66.0691
578.347	-54.7441
578.452	-43.4872
578.556	-32.1927
578.661	-21.0407
578.765	-9.6674
578.869	1.05395
578.974	11.1407
579.078	20.0009
579.182	27.3433
579.287	33.8239
579.391	39.5393
579.495	45.2646
579.6	50.6946
579.704	55.7141
579.808	60.2499
579.913	63.8413
580.017	65.7486
580.121	66.2747
580.226	66.0921
580.33	65.4639
580.434	64.1114
580.539	62.6481
580.643	61.1254
580.747	59.3983
580.852	57.1571
580.956	54.5766
581.06	51.2157
581.165	47.0718
581.269	42.5476
581.373	38.1904
581.478	33.9494
581.582	30.2636
581.686	26.9214
581.79	23.8337
581.895	20.7258
581.999	17.1771
582.103	13.3153
582.208	10.0394
582.312	7.75255
582.416	6.69782
582.521	6.73603
582.625	8.40758
582.729	10.4452
582.833	12.3646
582.938	14.7881
583.042	17.643
583.146	20.0101
583.251	21.5217
583.355	22.8782
583.459	24.1851
583.563	25.0869
583.668	25.6085
583.772	25.0965
583.876	23.9857
583.98	21.7714
584.085	18.8947
584.189	16.0959
584.293	14.2999
584.397	13.3392
584.502	13.0162
584.606	13.128
584.71	13.2316
584.814	12.5434
584.919	11.1891
585.023	9.61315
585.127	7.5281
585.231	4.61213
585.336	1.27881
585.44	-1.3463
585.544	-3.96055
585.648	-7.30108
585.753	-11.0919
585.857	-15.2473
585.961	-19.2286
586.065	-23.0919
586.169	-26.1847
586.274	-28.1236
586.378	-28.8163
586.482	-28.7672
586.586	-27.9645
586.69	-27.1348
586.795	-26.7212
586.899	-27.3738
587.003	-28.5247
587.107	-29.8896
587.212	-31.8709
587.316	-34.6143
587.42	-37.5998
587.524	-40.9501
587.628	-45.0443
587.732	-49.6684
587.837	-54.7095
587.941	-59.5602
588.045	-63.6499
588.149	-67.21
588.253	-69.8804
588.358	-71.4351
588.462	-71.9307
588.566	-71.3217
588.67	-70.0469
588.774	-68.3795
588.878	-66.2206
588.983	-63.3528
589.087	-59.2788
589.191	-53.9112
589.295	-47.4887
589.399	-39.9814
589.503	-31.6745
589.608	-23.1311
589.712	-14.8466
589.816	-6.97615
589.92	0.77467
590.024	8.5386
590.128	15.9953
590.232	22.7787
590.336	29.1297
590.441	34.7429
590.545	40.2561
590.649	46.1101
590.753	51.9322
590.857	56.6562
590.961	60.7107
591.065	64.6919
591.169	68.3995
591.274	72.0646
591.378	75.4357
591.482	78.4548
591.586	80.5758
591.69	81.5362
591.794	81.9264
591.898	81.3578
592.002	79.5631
592.106	75.912
592.211	70.5126
592.315	63.2278
592.419	54.5158
592.523	44.5695
592.627	34.2128
592.731	23.208
592.835	10.7787
592.939	-2.29936
593.043	-15.6965
593.147	-29.2974
593.251	-43.2522
593.355	-57.0679
593.46	-70.9362
593.564	-84.7874
593.668	-98.8814
593.772	-112.401
593.876	-123.907
593.98	-134.215
594.084	-143.61
594.188	-151.922
594.292	-158.756
594.396	-163.767
594.5	-166.592
594.604	-167.1
594.708	-164.903
594.812	-160.981
594.916	-156.109
595.02	-150.175
595.124	-142.521
595.228	-133.273
595.332	-123.351
595.437	-112.83
595.541	-102.239
595.645	-91.6709
595.749	-81.721
595.853	-72.2461
595.957	-63.6539
596.061	-56.5519
596.165	-50.9081
596.269	-46.6117
596.373	-43.5099
596.477	-41.233
596.581	-39.8393
596.685	-39.3615
596.789	-39.5813
596.893	-41.6262
596.997	-45.3096
597.101	-49.8327
597.205	-55.4388
597.309	-62.3447
597.413	-70.9042
597.517	-80.3994
597.621	-90.7834
597.725	-102.449
597.829	-114.969
597.933	-127.365
598.037	-139.298
598.141	-151.113
598.245	-162.278
598.348	-171.892
598.452	-179.664
598.556	-185.251
598.66	-188.934
598.764	-190.278
598.868	-189.219
598.972	-186.162
599.076	-180.992
599.18	-173.77
599.284	-165.483
599.388	-156.44
599.492	-146.923
599.596	-136.421
599.7	-125.326
599.804	-114.24
599.908	-102.824
600.012	-90.9361
600.116	-78.6243
600.219	-66.1431
600.323	-52.9749
600.421	-39.8285
600.525	-26.9535
600.63	-14.2283
600.734	-2.38968
600.839	8.46577
600.943	18.0524
601.047	26.0056
601.152	32.5365
601.256	36.8403
601.36	38.9195
601.465	38.6267
601.569	36.3888
601.674	32.7874
601.778	27.4021
601.882	20.5376
601.987	13.3851
602.091	6.39206
602.195	0.14066
602.3	-4.72151
602.404	-7.87047
602.509	-9.39354
602.613	-8.87785
602.717	-6.45358
602.822	-3.14569
602.926	1.36822
603.03	6.57698
603.135	12.1343
603.239	18.0011
603.343	23.1195
603.448	28.09
603.552	33.0716
603.656	37.911
603.761	42.9482
603.865	47.2409
603.969	51.2286
604.074	55.3456
604.178	59.5741
604.282	64.1836
604.387	69.3446
604.491	75.2684
604.595	81.1547
604.7	86.7786
604.804	91.7873
604.908	96.0573
605.013	99.7813
605.117	102.571
605.221	103.956
605.326	103.796
605.43	101.898
605.534	99.1587
605.639	95.2255
605.743	89.6997
605.847	82.71
605.952	74.2561
606.056	64.999
606.16	55.2199
606.264	45.0976
606.369	35.6179
606.473	27.3914
606.577	20.0501
606.682	12.8598
606.786	5.8364
606.89	-1.26416
606.994	-8.22982
607.099	-14.5402
607.203	-20.401
607.307	-25.7116
607.412	-30.2471
607.516	-34.2458
607.62	-37.4574
607.724	-40.0975
607.829	-42.6868
607.933	-45.2239
608.037	-47.3184
608.141	-48.7129
608.246	-48.9846
608.35	-48.4683
608.454	-46.8141
608.559	-44.2942
608.663	-41.8596
608.767	-40.0182
608.871	-38.321
608.976	-36.6431
609.08	-34.2718
609.184	-31.4198
609.288	-28.6595
609.393	-25.8379
609.497	-23.0999
609.601	-20.783
609.705	-19.0049
609.809	-17.6476
609.914	-17.5519
610.018	-18.2179
610.122	-19.0941
610.226	-20.0736
610.331	-21.1909
610.435	-22.3114
610.539	-22.4358
610.643	-21.8426
610.747	-21.0706
610.852	-20.2365
610.956	-18.8387
611.06	-16.4018
611.164	-12.5045
611.269	-7.91975
611.373	-2.63218
611.477	3.16805
611.581	9.58442
611.685	15.4908
611.79	20.6431
611.894	25.251
611.998	28.5943
612.102	31.3931
612.206	34.1858
612.311	36.6144
612.415	38.9698
612.519	41.1543
612.623	43.5965
612.727	45.5307
612.831	46.8001
612.936	47.6955
613.04	48.985
613.144	50.7015
613.248	53.0191
613.352	55.0251
613.457	56.4327
613.561	57.3078
613.665	57.7262
613.769	56.8451
613.873	55.1061
613.977	53.1111
614.082	50.5999
614.186	48.2891
614.29	46.6758
614.394	45.7521
614.498	45.5048
614.602	45.9884
614.706	47.2365
614.811	48.5591
614.915	49.7926
615.019	51.1029
615.123	52.279
615.227	53.4247
615.331	54.4515
615.435	54.5578
615.54	53.9184
615.644	52.306
615.748	49.6671
615.852	45.0513
615.956	39.8723
616.06	34.2541
616.164	28.3395
616.268	22.6739
616.373	17.4936
616.477	12.6441
616.581	8.17448
616.685	4.23675
616.789	-0.08507
616.893	-4.61641
616.997	-9.05599
617.101	-13.3645
617.205	-17.2396
617.309	-20.4352
617.414	-23.5523
617.518	-26.9898
617.622	-30.3793
617.726	-33.1778
617.83	-35.3327
617.934	-37.7322
618.038	-38.6805
618.142	-38.5825
618.246	-37.3213
618.35	-35.1109
618.454	-32.1742
618.558	-28.4507
618.663	-24.5757
618.767	-21.193
618.871	-18.629
618.975	-16.5953
619.079	-15.1294
619.183	-14.9864
619.287	-15.6371
619.391	-16.7696
619.495	-18.654
619.599	-21.1861
619.703	-23.8594
619.807	-26.1629
619.911	-28.4759
620.015	-30.6625
620.119	-31.2954
620.223	-31.0707
620.328	-29.887
620.432	-27.1079
620.536	-22.6272
620.64	-17.0092
620.744	-10.6589
620.848	-3.24137
620.952	4.92025
621.056	12.934
621.16	20.321
621.264	26.7249
621.368	32.8693
621.472	38.7992
621.576	44.1784
621.68	49.1732
621.784	54.0991
621.888	59.0866
621.992	63.414
622.096	67.3007
622.2	71.142
622.304	73.7622
622.408	75.9351
622.512	77.1294
622.616	77.0606
622.72	75.8436
622.824	73.3024
622.928	69.1338
623.032	63.8966
623.136	58.0091
623.24	50.9971
623.344	42.9886
623.448	34.919
623.552	26.7118
623.656	18.2155
623.76	9.80394
623.864	2.15865
623.968	-4.87363
624.072	-11.9425
624.176	-18.4739
624.28	-23.8811
624.384	-28.7025
624.488	-32.4275
624.591	-35.155
624.695	-36.8558
624.799	-38.0245
624.903	-38.6833
625.007	-38.5356
625.111	-38.0815
625.215	-38.3642
625.319	-38.0893
625.423	-37.1328
625.527	-34.7484
625.631	-31.2792
625.735	-26.232
625.839	-19.8673
625.943	-12.6331
626.047	-5.28486
626.151	1.68343
626.255	8.63405
626.359	15.5946
626.462	22.0779
626.566	28.3386
626.67	34.2187
626.774	40.2291
626.878	46.5754
626.982	53.2852
627.086	60.0059
627.19	66.1353
627.294	71.302
627.398	75.6029
627.502	79.4806
627.605	82.9616
627.709	85.8679
627.813	88.3849
627.917	89.8078
628.021	89.834
628.125	87.9114
628.229	84.4021
628.333	79.5012
628.437	73.6813
628.54	66.732
628.644	58.9719
628.748	50.9522
628.852	43.6237
628.956	36.2197
629.06	29.075
629.164	22.5758
629.268	17.0271
629.371	13.0694
629.475	10.924
629.579	10.0291
629.683	10.2055
629.787	11.1037
629.891	12.6178
629.995	13.1774
630.098	12.56
630.202	11.1829
630.306	9.14768
630.41	7.05963
630.514	5.04343
630.618	2.77214
630.721	0.60889
630.825	-1.26154
630.929	-2.31078
631.033	-2.79363
631.137	-2.54306
631.241	-2.06235
631.344	-1.38855
631.448	-0.32212
631.552	0.76391
631.656	1.37755
631.76	1.00954
631.864	-0.60696
631.967	-3.31299
632.071	-7.93627
632.175	-13.6894
632.279	-19.5874
632.383	-25.7135
632.486	-31.8853
632.59	-38.3197
632.694	-44.7977
632.798	-50.9964
632.902	-56.2862
633.005	-60.3205
633.109	-63.5099
633.213	-64.9685
633.317	-65.4015
633.42	-64.7547
633.524	-63.3438
633.628	-62.0889
633.732	-61.4841
633.836	-61.4601
633.939	-61.4659
634.043	-61.0191
634.147	-60.376
634.251	-59.3319
634.354	-57.7242
634.458	-55.9365
634.562	-53.9736
634.666	-51.8052
634.769	-49.5635
634.873	-47.2905
634.977	-44.6618
635.081	-41.3231
635.184	-37.5758
635.288	-33.5255
635.392	-30.5073
635.496	-28.204
635.599	-26.6669
635.703	-25.7066
635.807	-24.8969
635.911	-23.3556
636.014	-20.9302
636.118	-17.8629
636.222	-14.283
636.326	-10.7298
636.429	-6.74061
636.533	-2.96148
636.637	0.7649
636.74	4.29958
636.844	8.09839
636.948	12.2342
637.052	16.9327
637.155	22.4221
637.259	27.95
637.363	33.0261
637.466	37.36
637.57	41.7634
637.674	46.767
637.777	52.2814
637.881	57.961
637.985	64.1814
638.088	69.9836
638.192	74.8714
638.296	78.5201
638.399	80.1566
638.503	80.564
638.607	79.5152
638.71	77.4479
638.814	75.016
638.918	72.017
639.021	68.6833
639.125	65.2722
639.229	61.9732
639.332	58.8551
639.436	55.6371
639.54	52.544
639.643	50.1468
639.747	48.8811
639.851	48.2351
639.954	48.1263
640.058	48.5535
640.162	48.1845
640.265	47.2767
640.369	45.8569
640.473	43.4588
640.576	41.1519
640.68	38.6805
640.783	36.0948
640.887	33.6137
640.991	31.0612
641.094	28.632
641.198	26.2755
641.302	24.2514
641.405	22.5321
641.509	21.0696
641.612	20.4608
641.716	20.9277
641.82	22.3401
641.923	23.8478
642.027	25.4066
642.13	26.9493
642.234	28.0593
642.338	29.9158
642.441	32.7261
642.545	36.3747
642.648	41.7893
642.752	48.8863
642.855	57.7325
642.959	68.2133
643.063	80.2435
643.166	93.8175
643.27	109.112
643.373	125.774
643.477	143.923
643.58	163.539
643.684	185.604
643.788	210.445
643.891	238.718
643.995	270.453
644.098	306.44
644.202	347.296
644.305	393.195
644.409	444.882
644.512	501.423
644.616	562.398
644.72	627.912
644.823	697.159
644.927	769.007
645.03	842.288
645.134	915.692
645.237	987.918
645.341	1057.47
645.444	1122.92
645.548	1183.61
645.651	1238.82
645.755	1288.29
645.858	1330.83
645.962	1365.95
646.065	1393.2
646.169	1412.46
646.272	1423.83
646.376	1426.9
646.479	1421.43
646.583	1406.98
646.686	1384.29
646.79	1354.42
646.893	1318.47
646.997	1277.48
647.1	1232.97
647.204	1186.89
647.307	1141.14
647.411	1097.76
647.514	1058.67
647.618	1026.72
647.721	1003.33
647.825	989.123
647.928	984.618
648.032	990.359
648.135	1006
648.239	1030.7
648.342	1063.15
648.388	1101.42
648.492	1143.52
648.596	1187.39
648.7	1231.8
648.804	1275.63
648.908	1317.35
649.012	1355.23
649.116	1388.17
649.22	1416.07
649.324	1438.59
649.428	1455.53
649.532	1467.71
649.636	1475.53
649.74	1478.5
649.844	1476.07
649.948	1468.29
650.052	1455.18
650.155	1436.56
650.259	1412.6
650.363	1383.76
650.467	1350.63
650.571	1314.28
650.675	1276.84
650.779	1240.9
650.883	1208.31
650.987	1181.04
651.091	1160.8
651.195	1149.63
651.298	1149.73
651.402	1161.61
651.506	1185.35
651.61	1220.83
651.714	1266.32
651.818	1319.77
651.922	1378.55
652.026	1441.01
652.13	1504.63
652.234	1567.05
652.337	1626.55
652.441	1681.79
652.545	1731.43
652.649	1775.05
652.753	1812.91
652.857	1844.87
652.961	1871.37
653.064	1893.31
653.168	1911.53
653.272	1928.4
653.376	1945.07
653.48	1961.76
653.584	1978.7
653.688	1996.59
653.792	2014.4
653.895	2032.55
653.999	2050.54
654.103	2068.16
654.207	2084.81
654.311	2100.58
654.415	2115.11
654.518	2127.39
654.622	2137.02
654.726	2144.17
654.83	2149.61
654.934	2154.09
655.038	2159.16
655.141	2166.15
655.245	2176.21
655.349	2190.98
655.453	2210.24
655.557	2233.65
655.661	2260.46
655.764	2289.58
655.868	2319.44
655.972	2349.53
656.076	2377.44
656.18	2402.04
656.283	2421.85
656.387	2435.58
656.491	2441.69
656.595	2438.92
656.699	2427.54
656.802	2408.76
656.906	2384.01
657.01	2354.22
657.114	2321.8
657.218	2288.35
657.321	2256.22
657.425	2227.62
657.529	2203.16
657.633	2183.95
657.737	2170.74
657.84	2164.68
657.944	2166.45
658.048	2176.24
658.152	2192.87
658.255	2215.86
658.359	2244.28
658.463	2277.08
658.567	2312.61
658.671	2349.62
658.774	2388.14
658.878	2428.41
658.982	2470.15
[truncated: 1,864 more rows]
